# Supplementary material for: Development of Quality Control Ranges for Biocide Susceptibility Testing
Source: MDPI journal article supplement (doi:10.3390/pathogens11020223), 2022-02-08
Supplement: s1 [file s1]

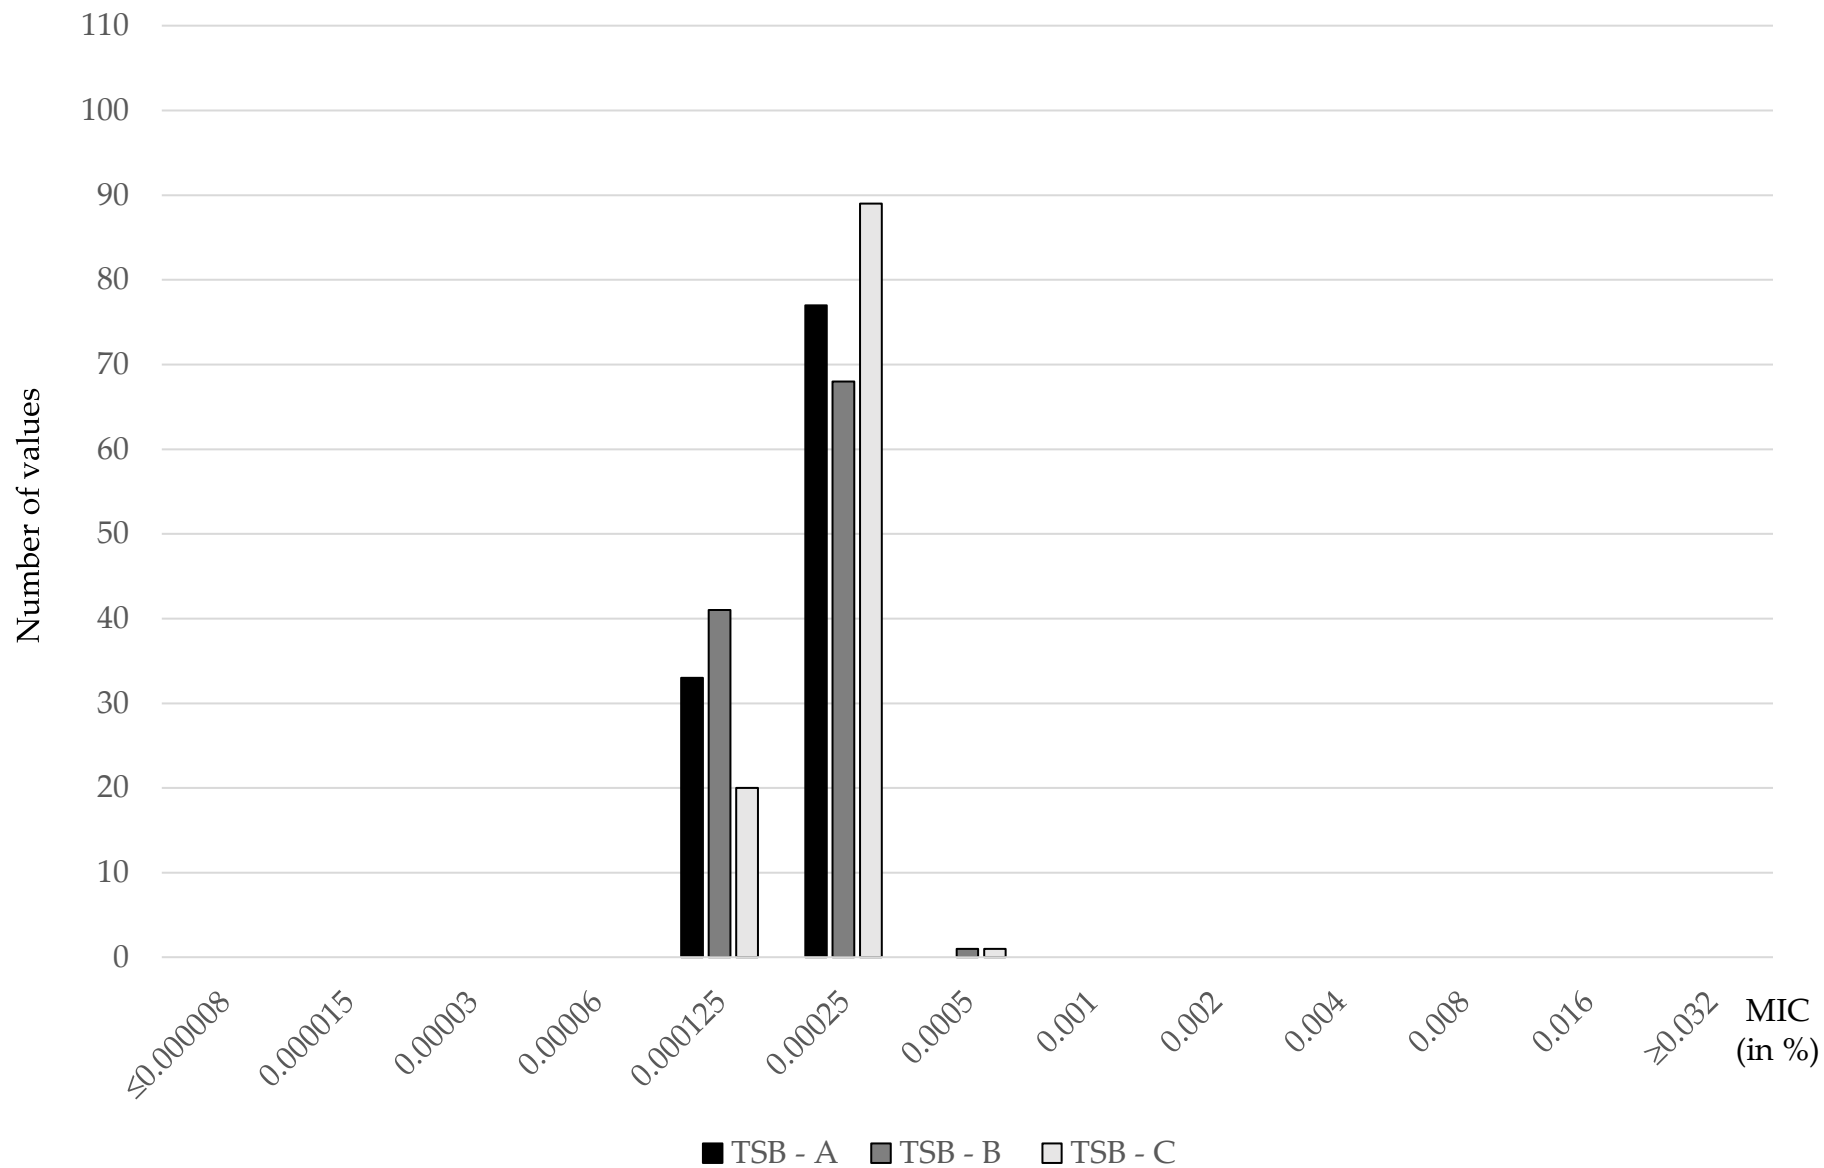

Figure S2a: Differences of the media lots for *E. hirae* ATCC® 10541 and benzalkonium chloride

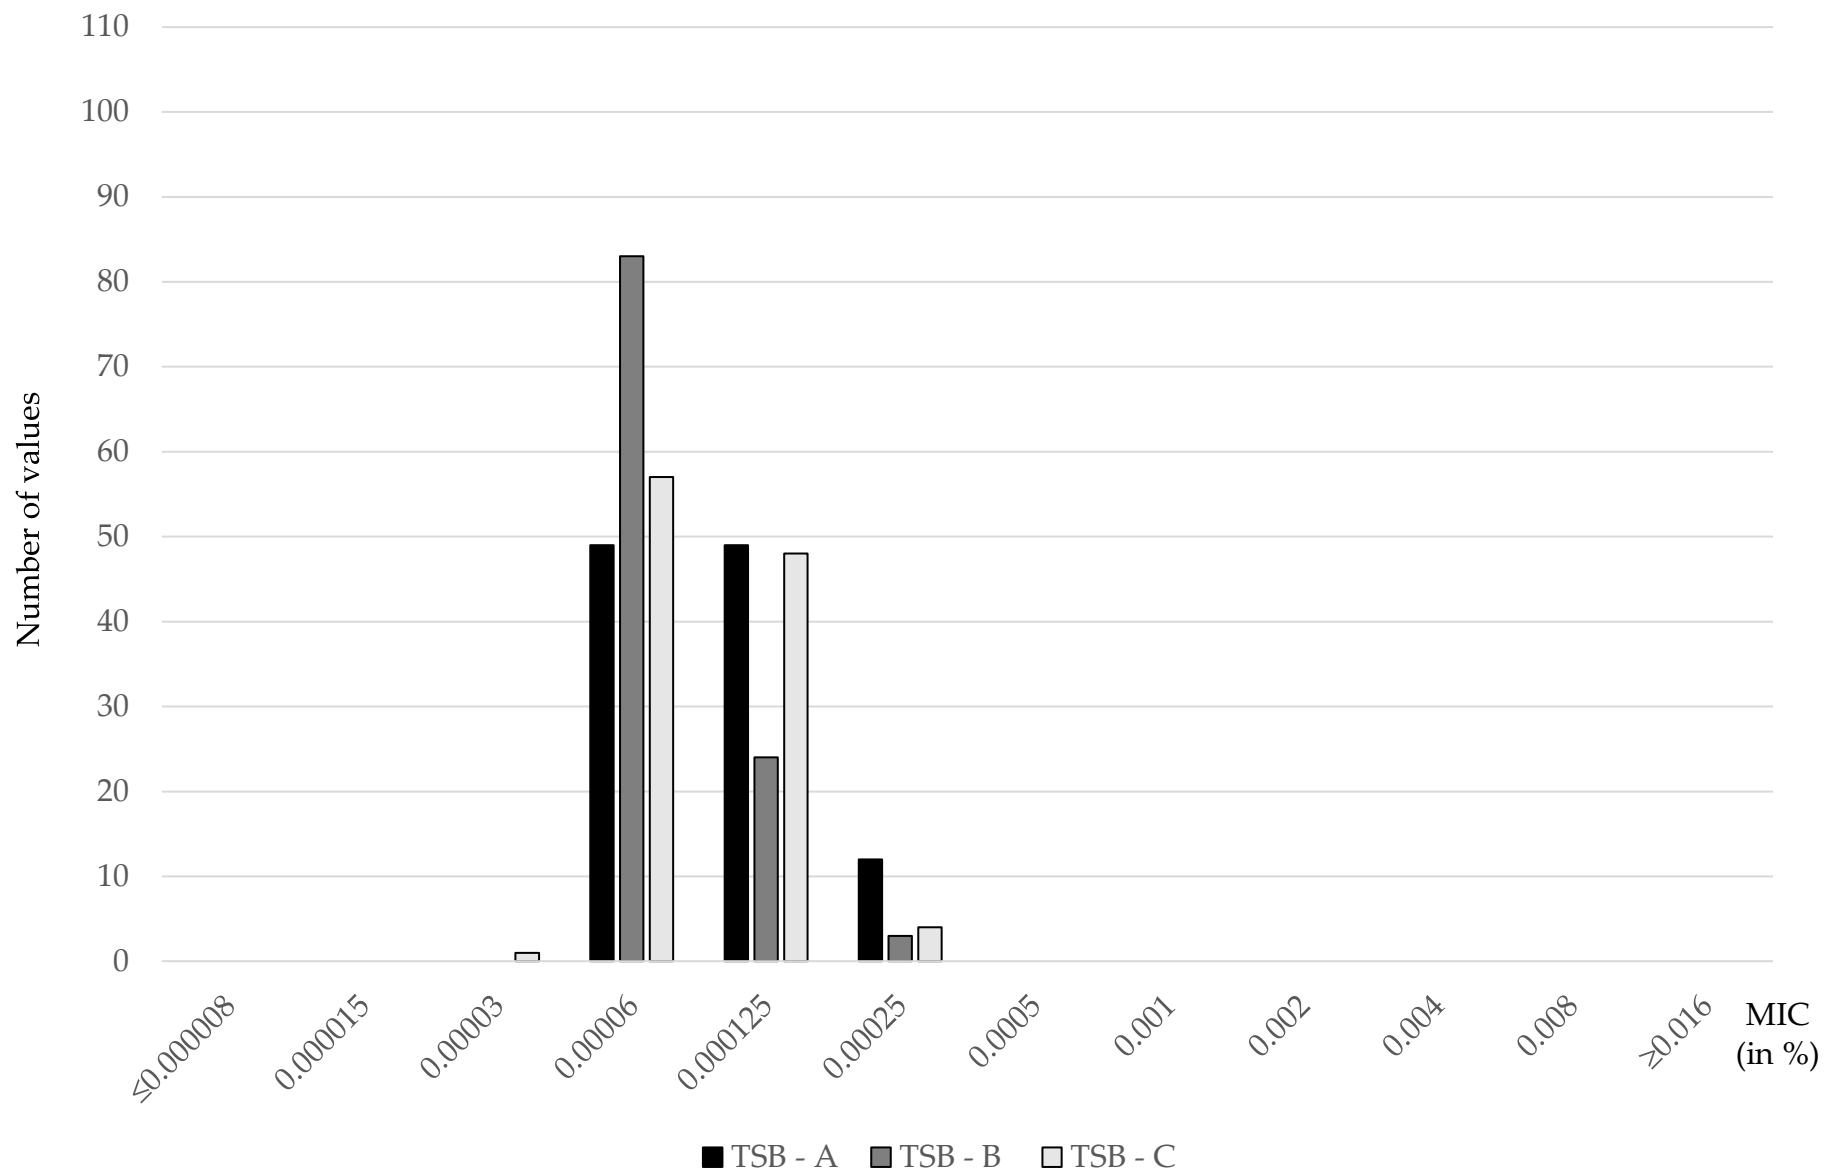

Figure S2b: Differences of the media lots for *E. hirae* ATCC® 10541 and chlorhexidine

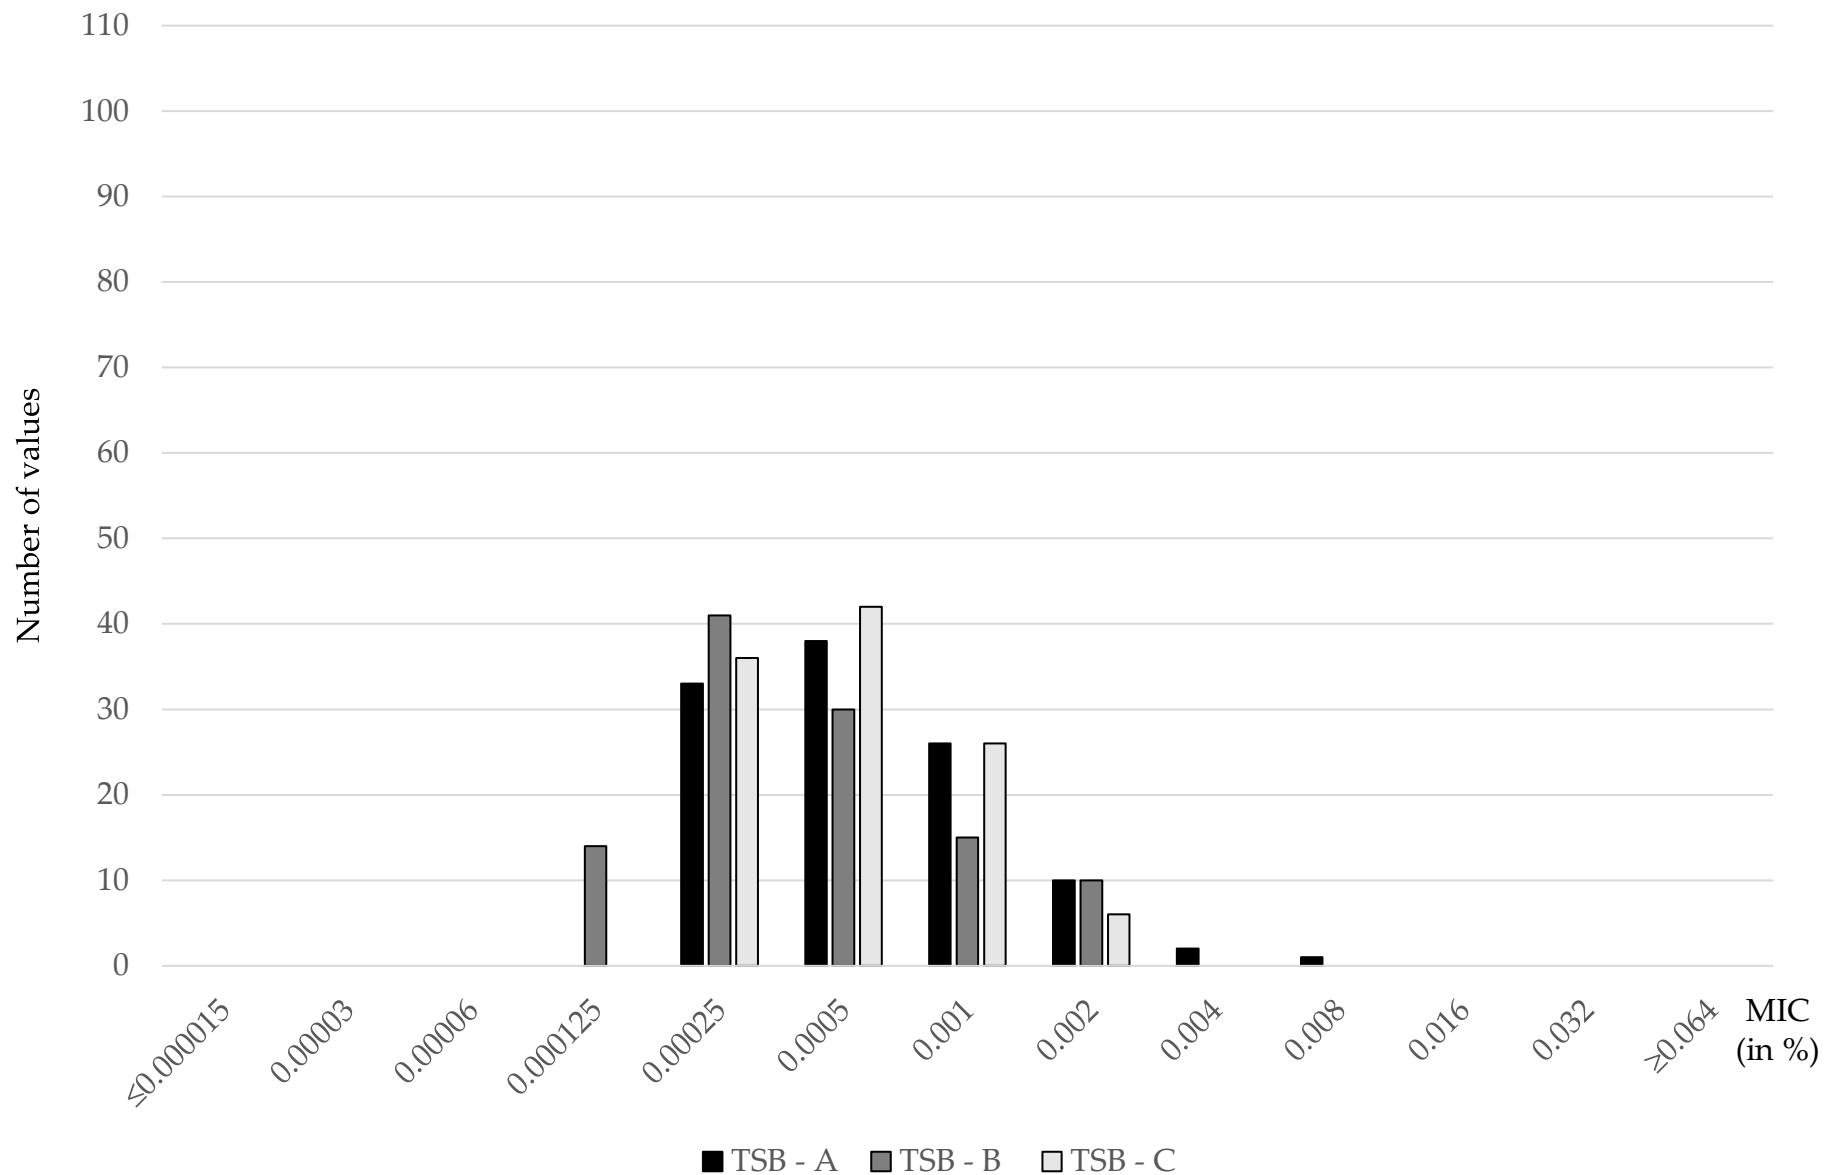

Figure S2c: Differences of the media lots for *E. hirae* ATCC® 10541 and polyhexanide

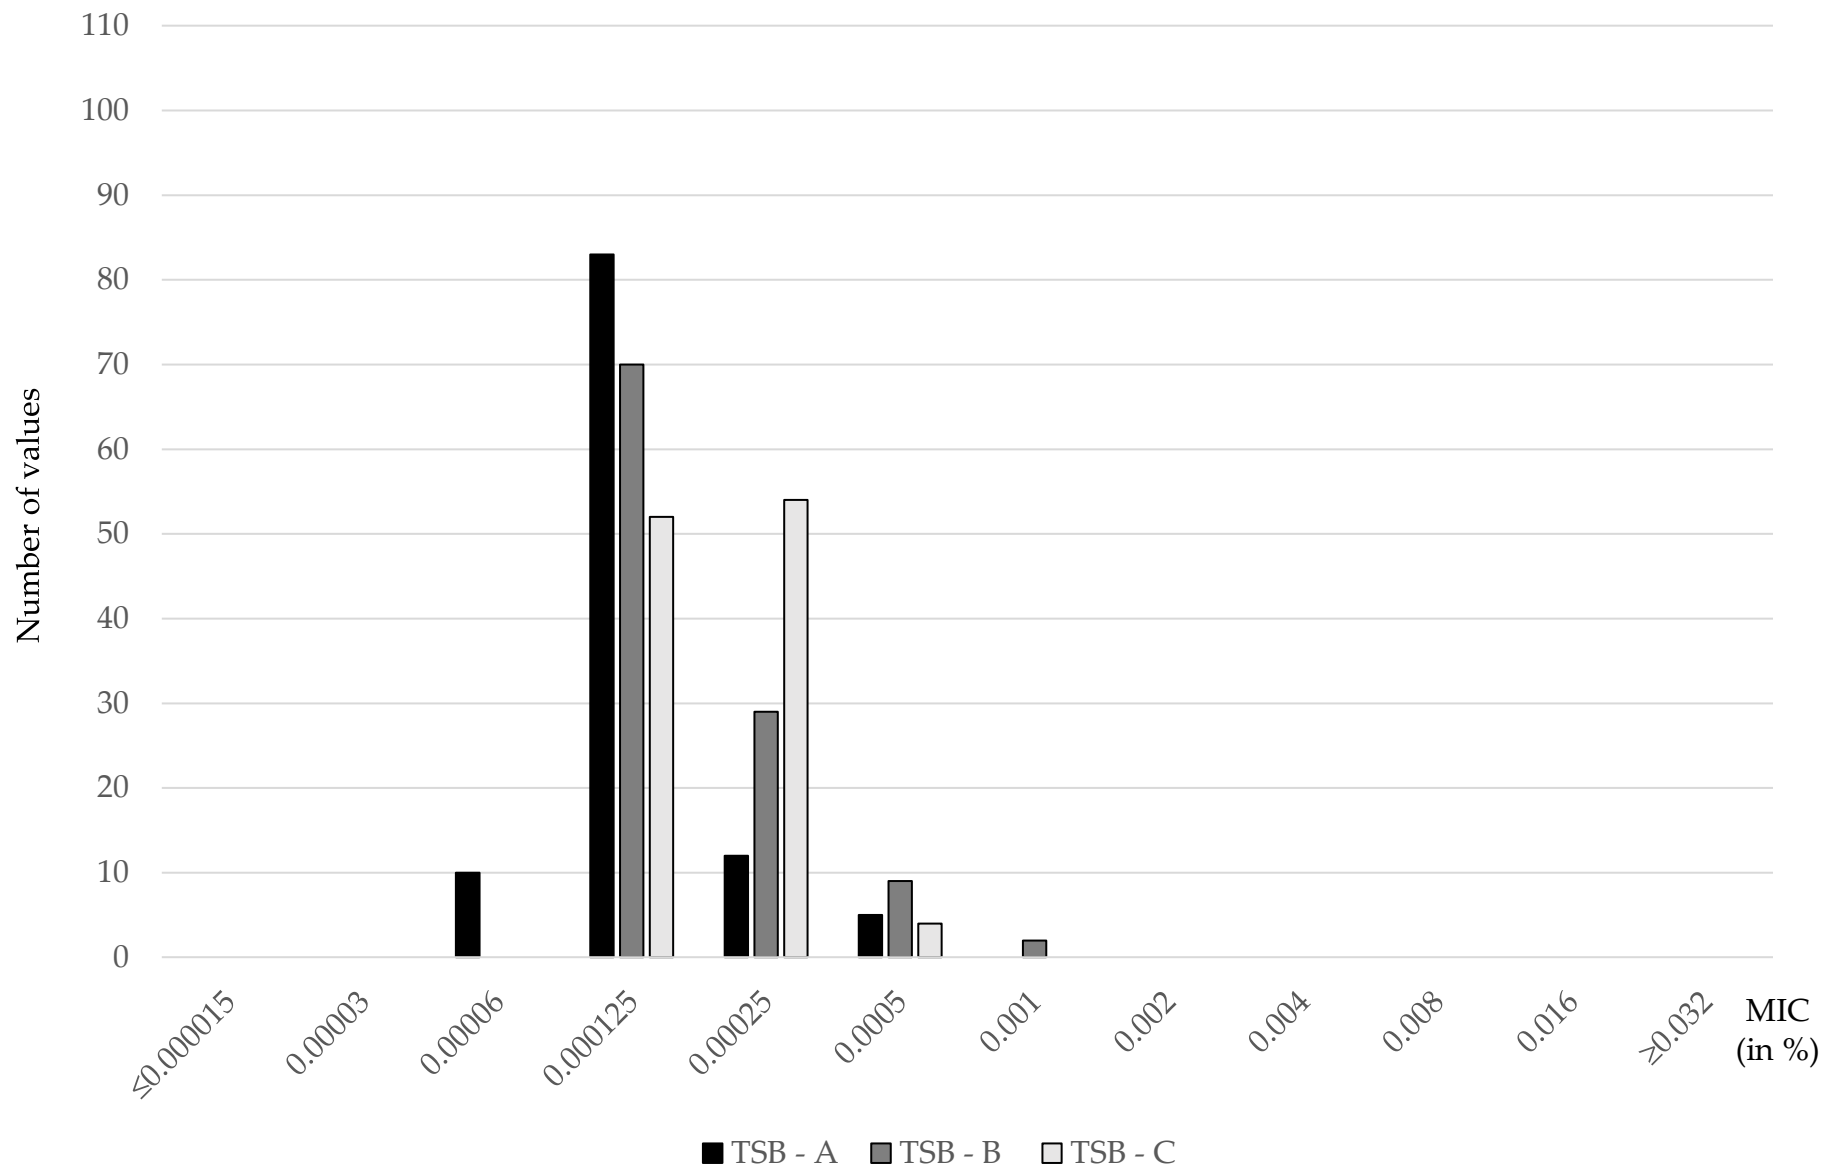

Figure S2d: Differences of the media lots for *E. hirae* ATCC® 10541 and octenidine
