# Supplementary material for: Development of Quality Control Ranges for Biocide Susceptibility Testing
Source: MDPI journal article supplement (doi:10.3390/pathogens11020223), 2022-02-08
Supplement: s1 [file s1]

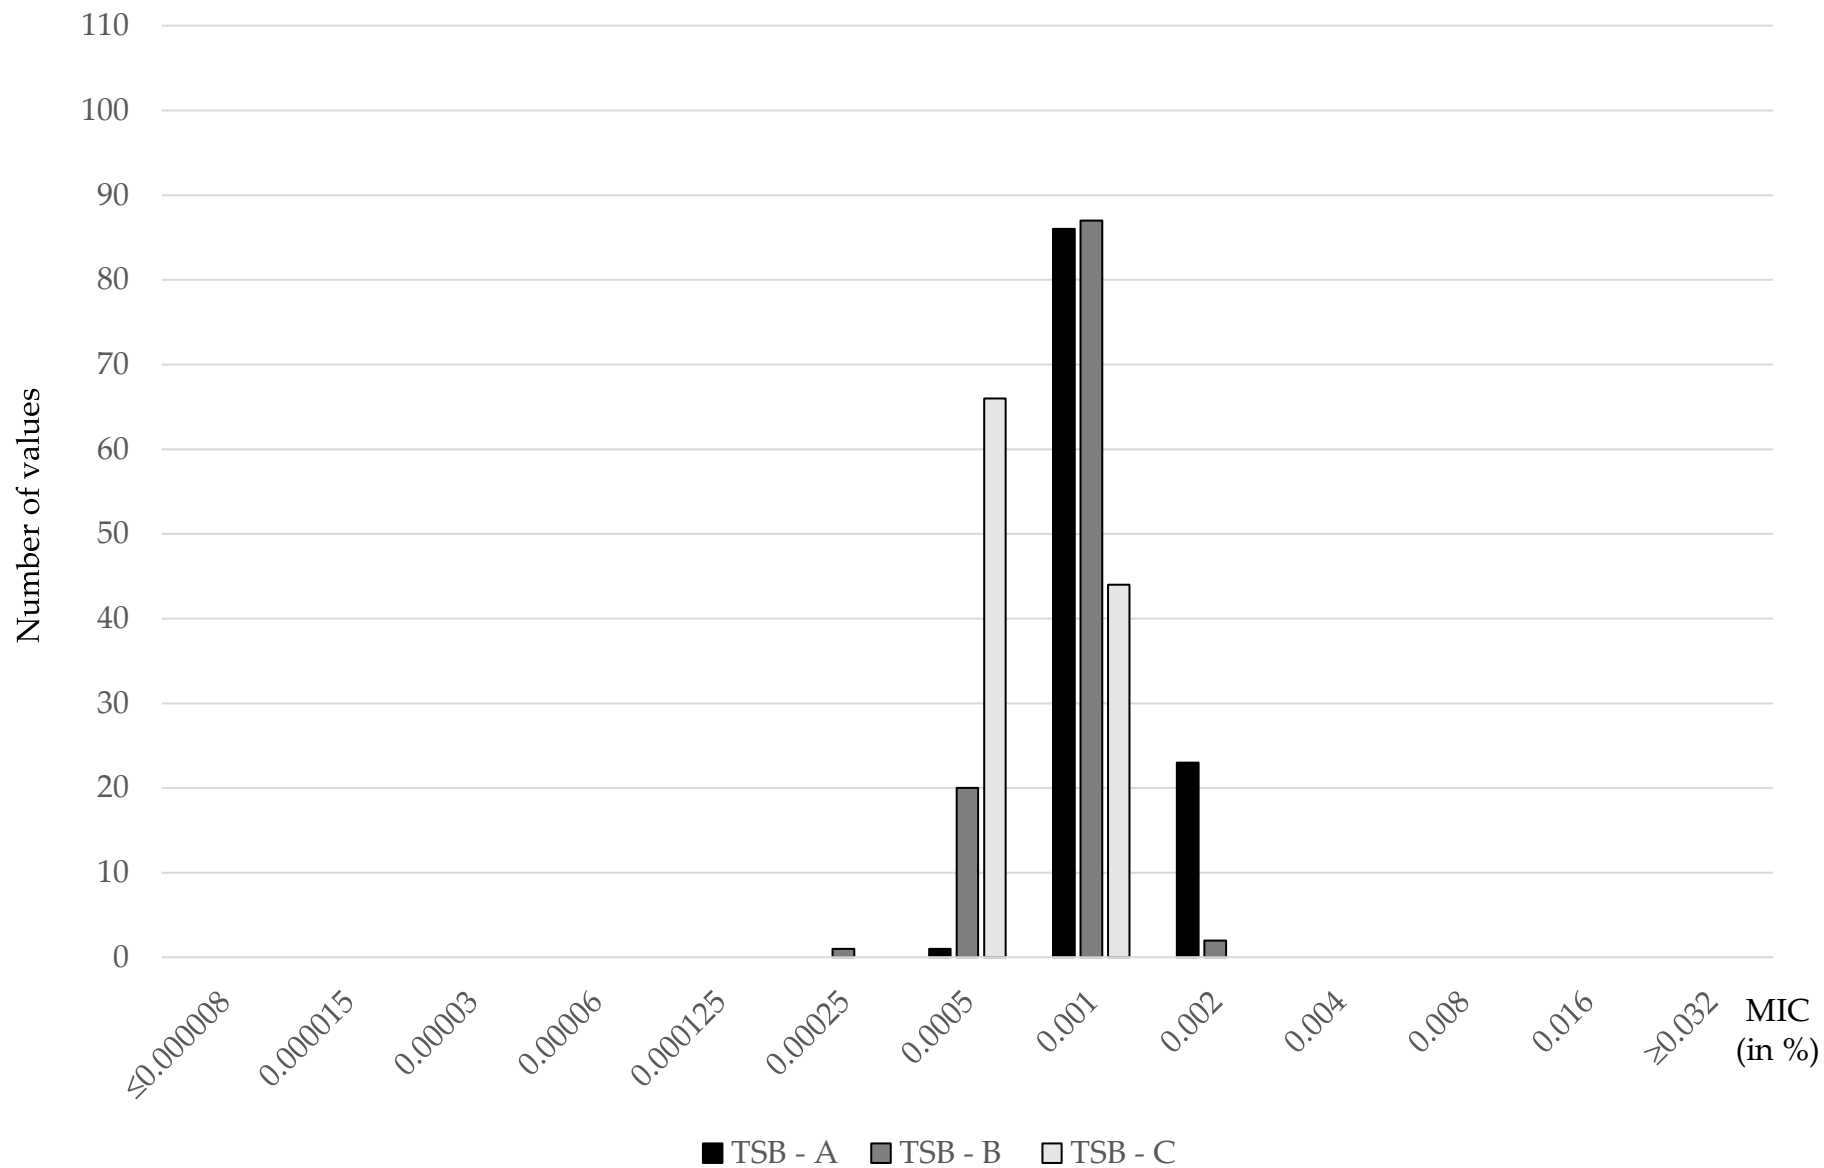

Figure S3a: Differences of the media lots for *E. coli* ATCC® 10536 and benzalkonium chloride

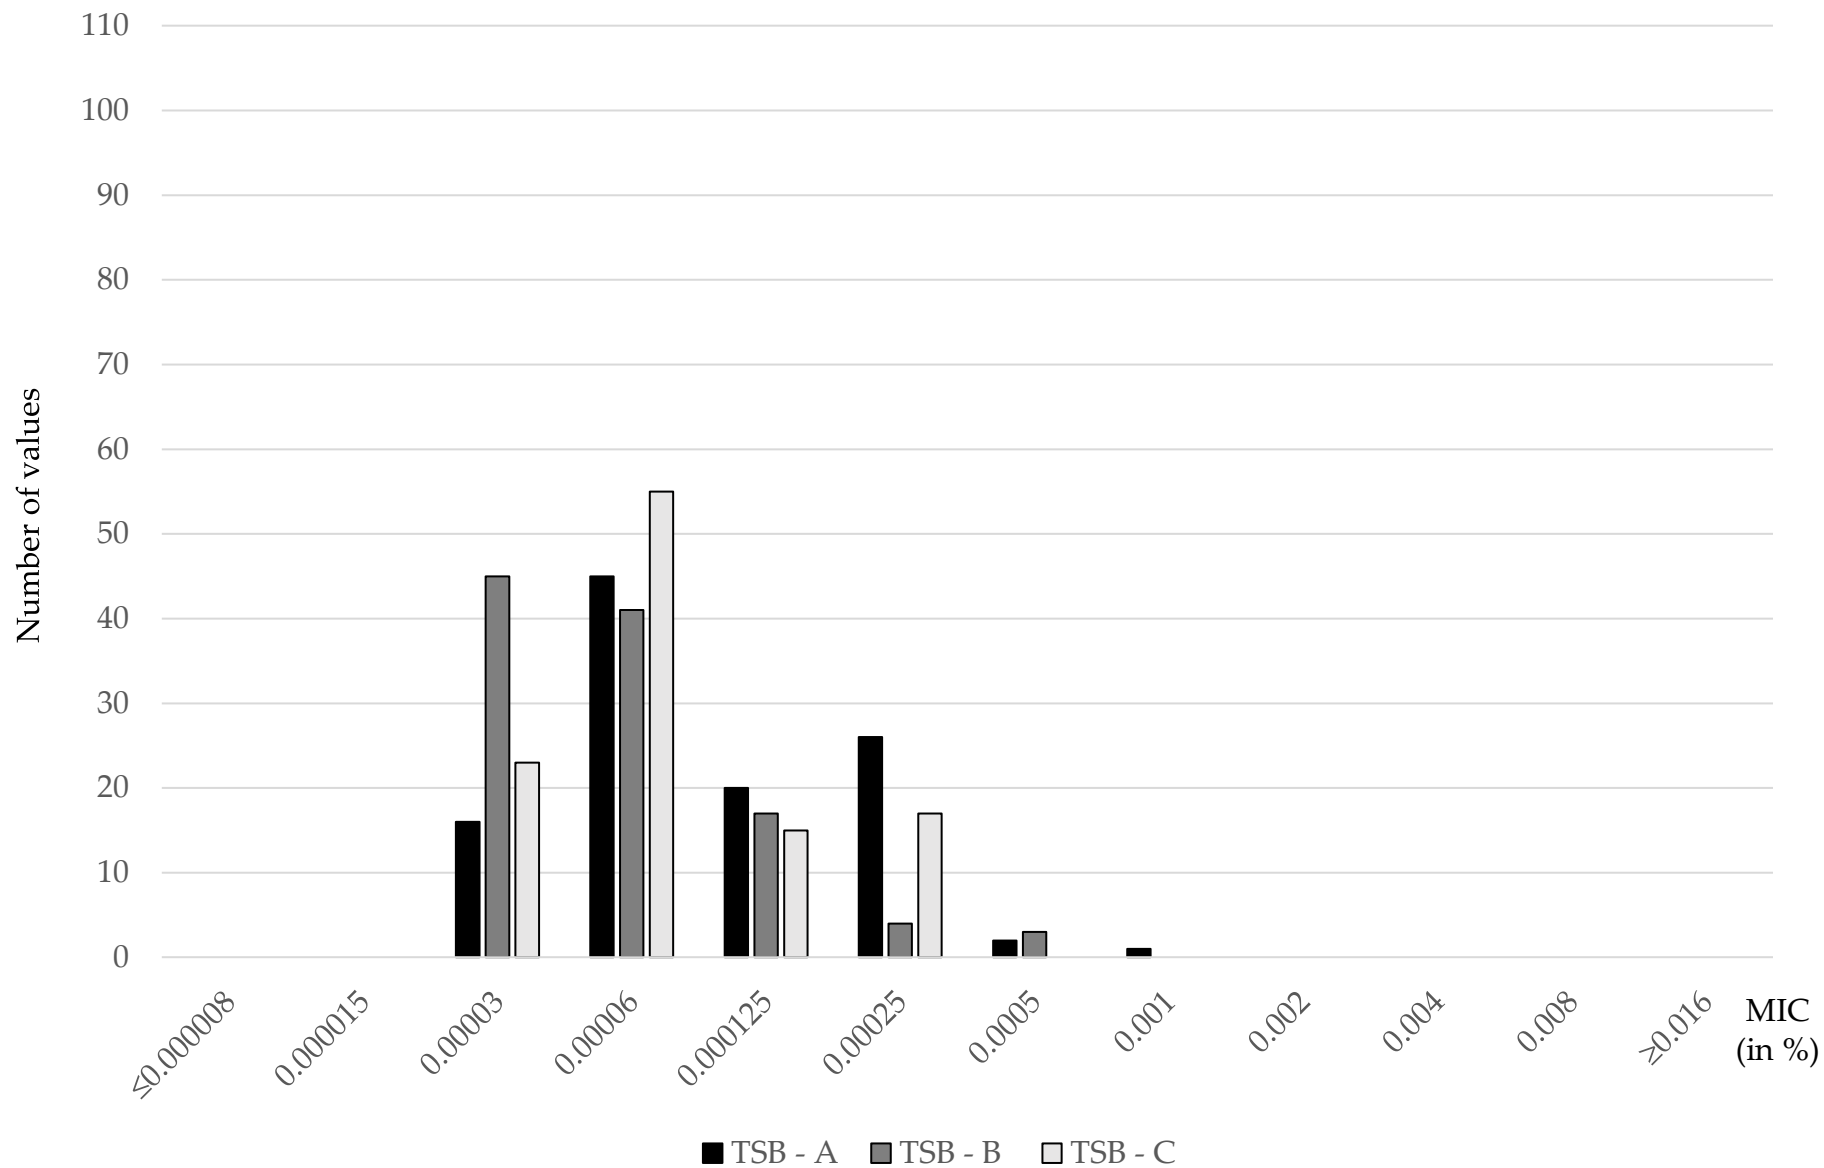

Figure S3b: Differences of the media lots for *E. coli* ATCC® 10536 and chlorhexidine

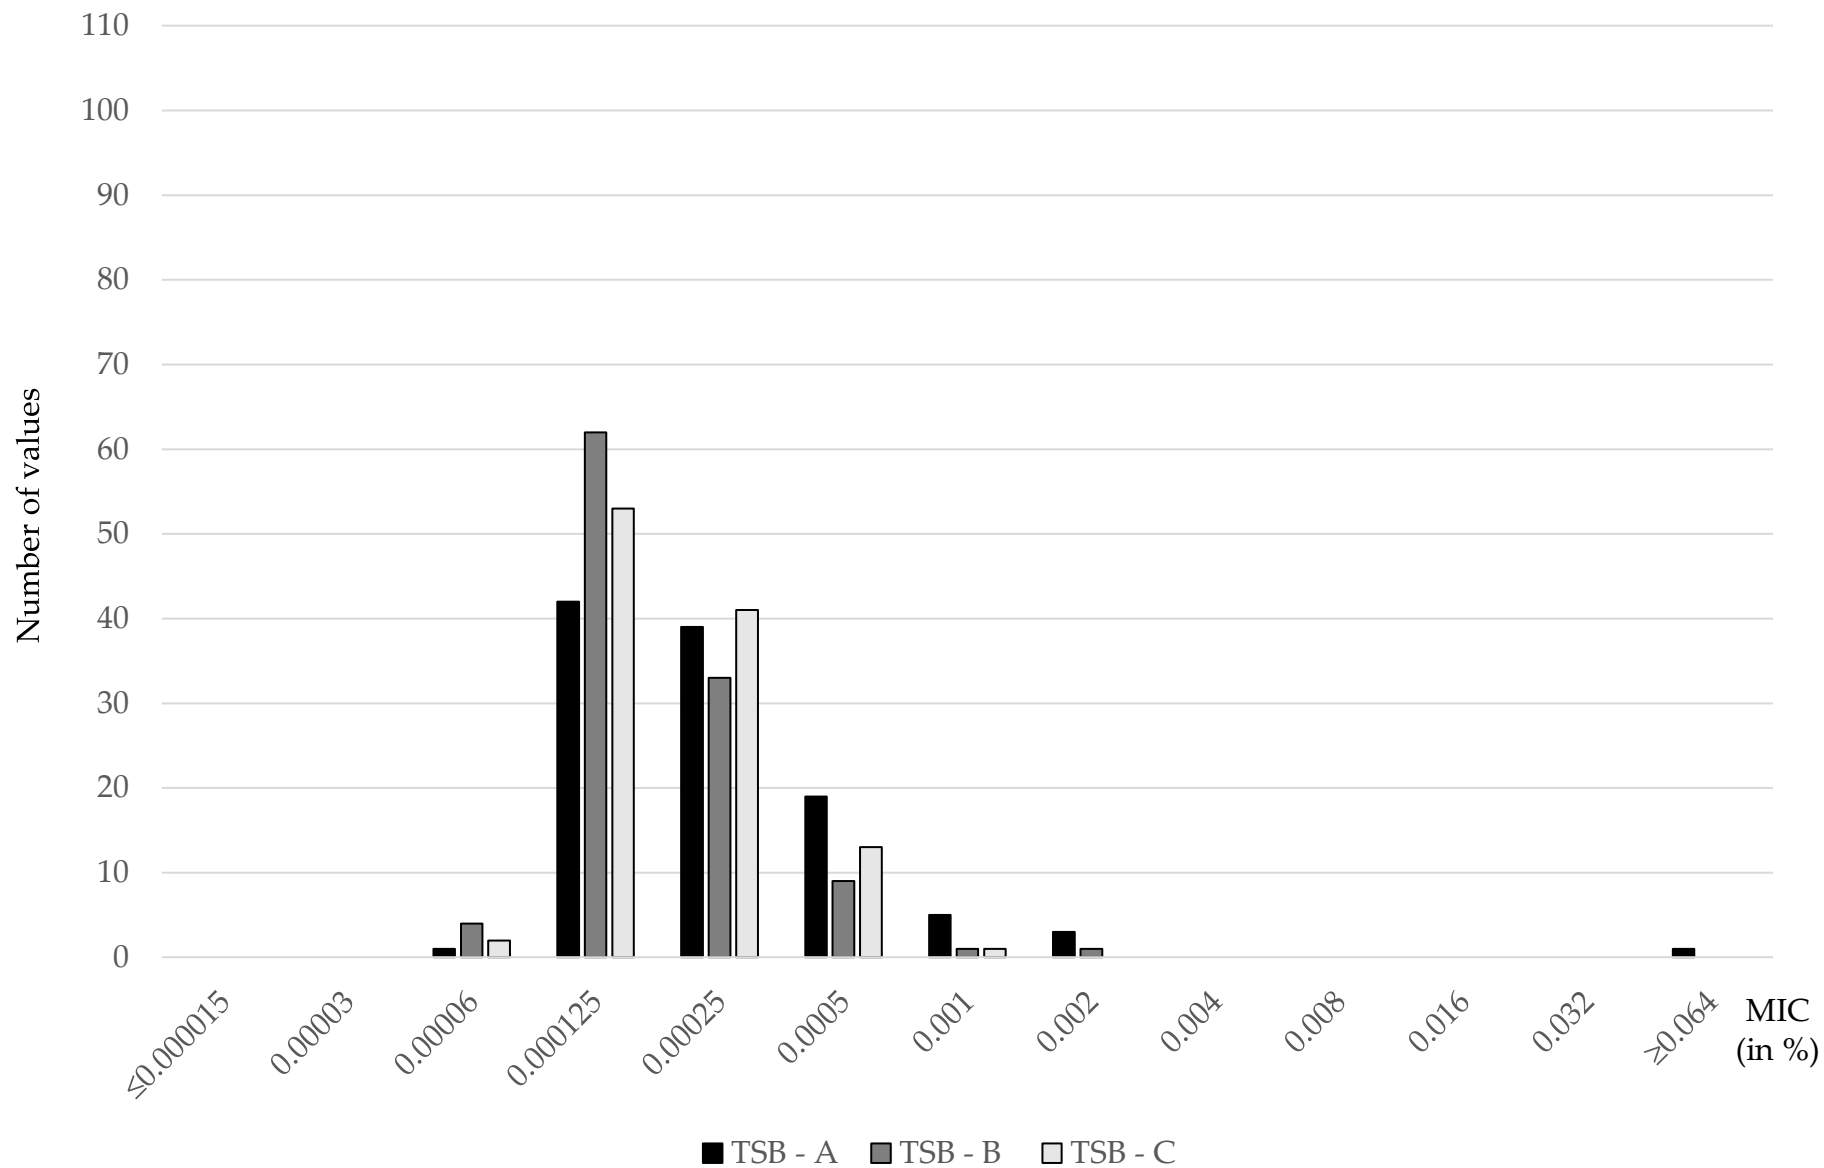

Figure S3c: Differences of the media lots for *E. coli* ATCC® 10536 and polyhexanide

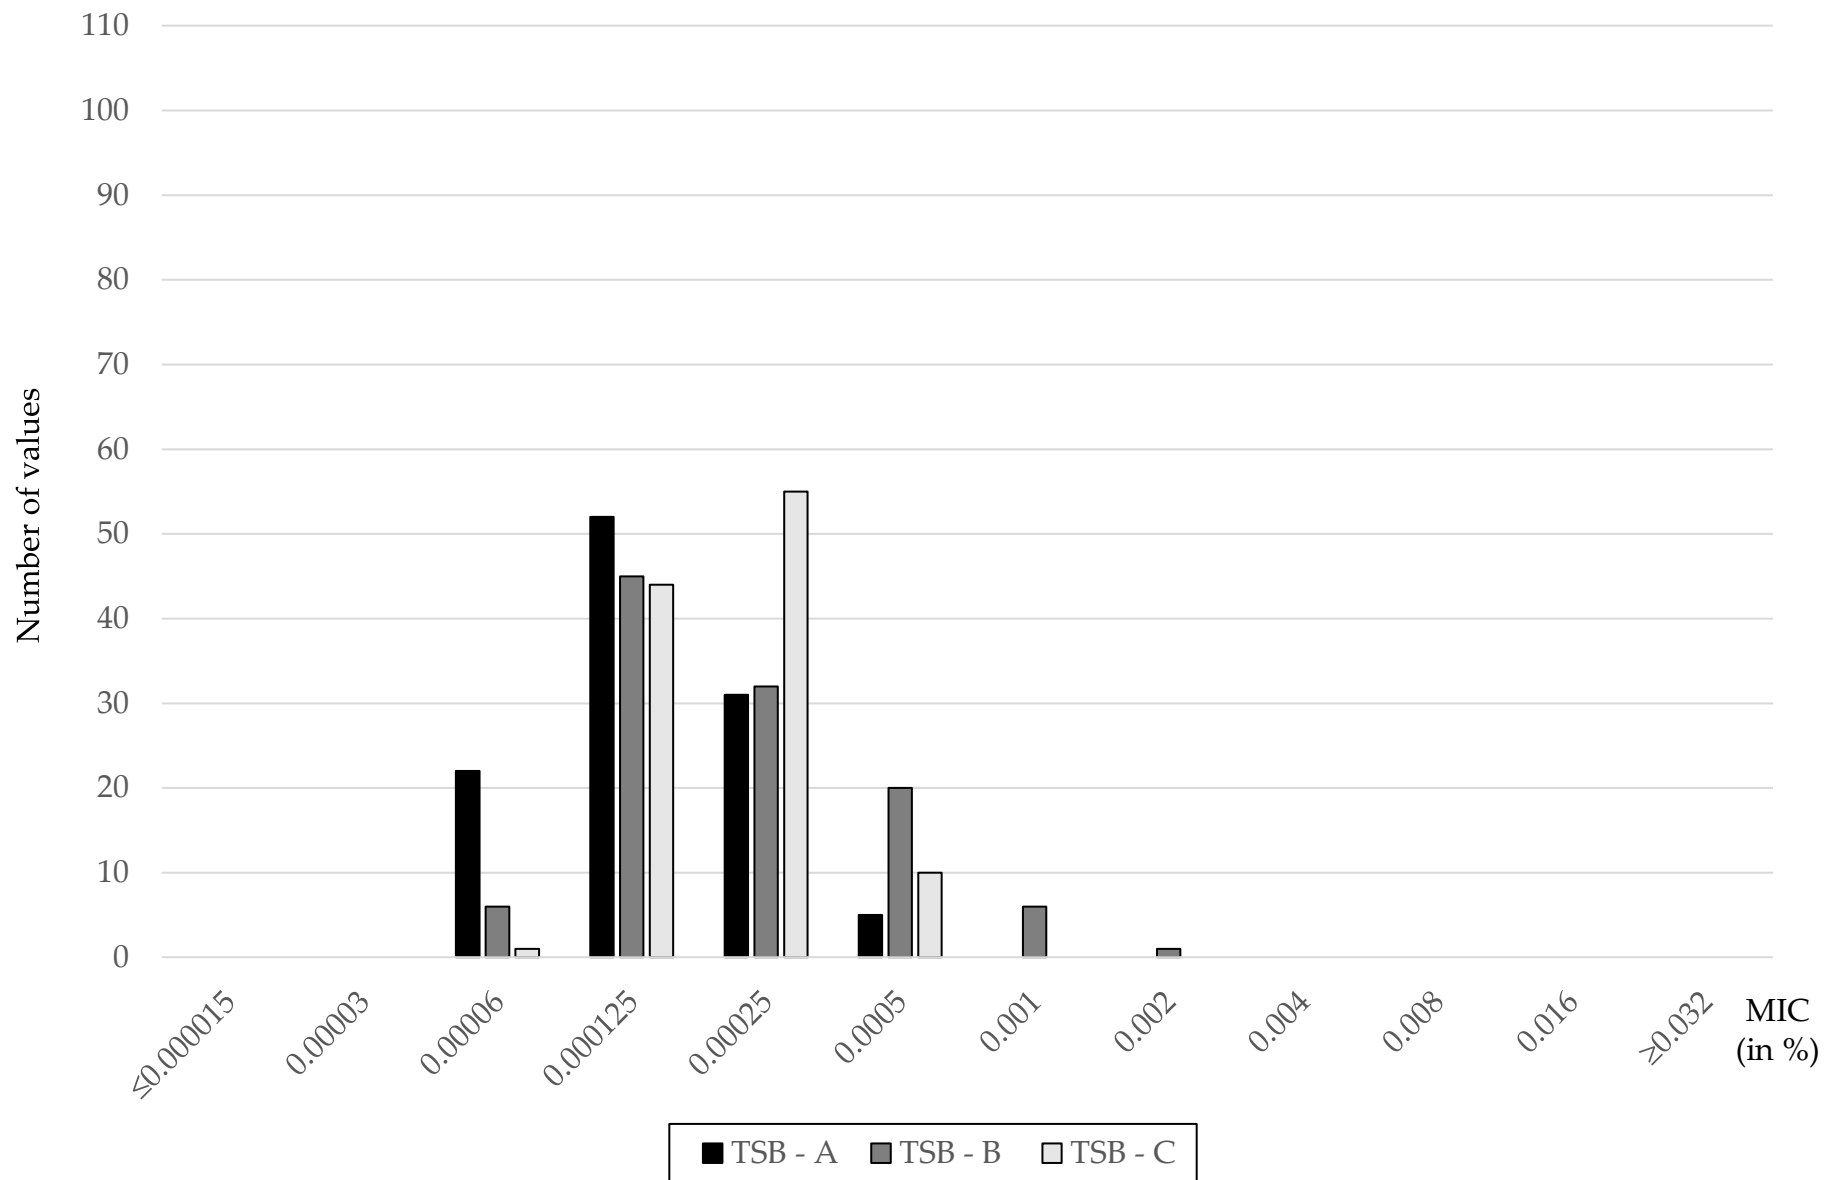

Figure S3d: Differences of the media lots for *E. coli* ATCC® 10536 and octenidine
