# Supplementary material for: Development of Quality Control Ranges for Biocide Susceptibility Testing
Source: MDPI journal article supplement (doi:10.3390/pathogens11020223), 2022-02-08
Supplement: s1 [file s1]

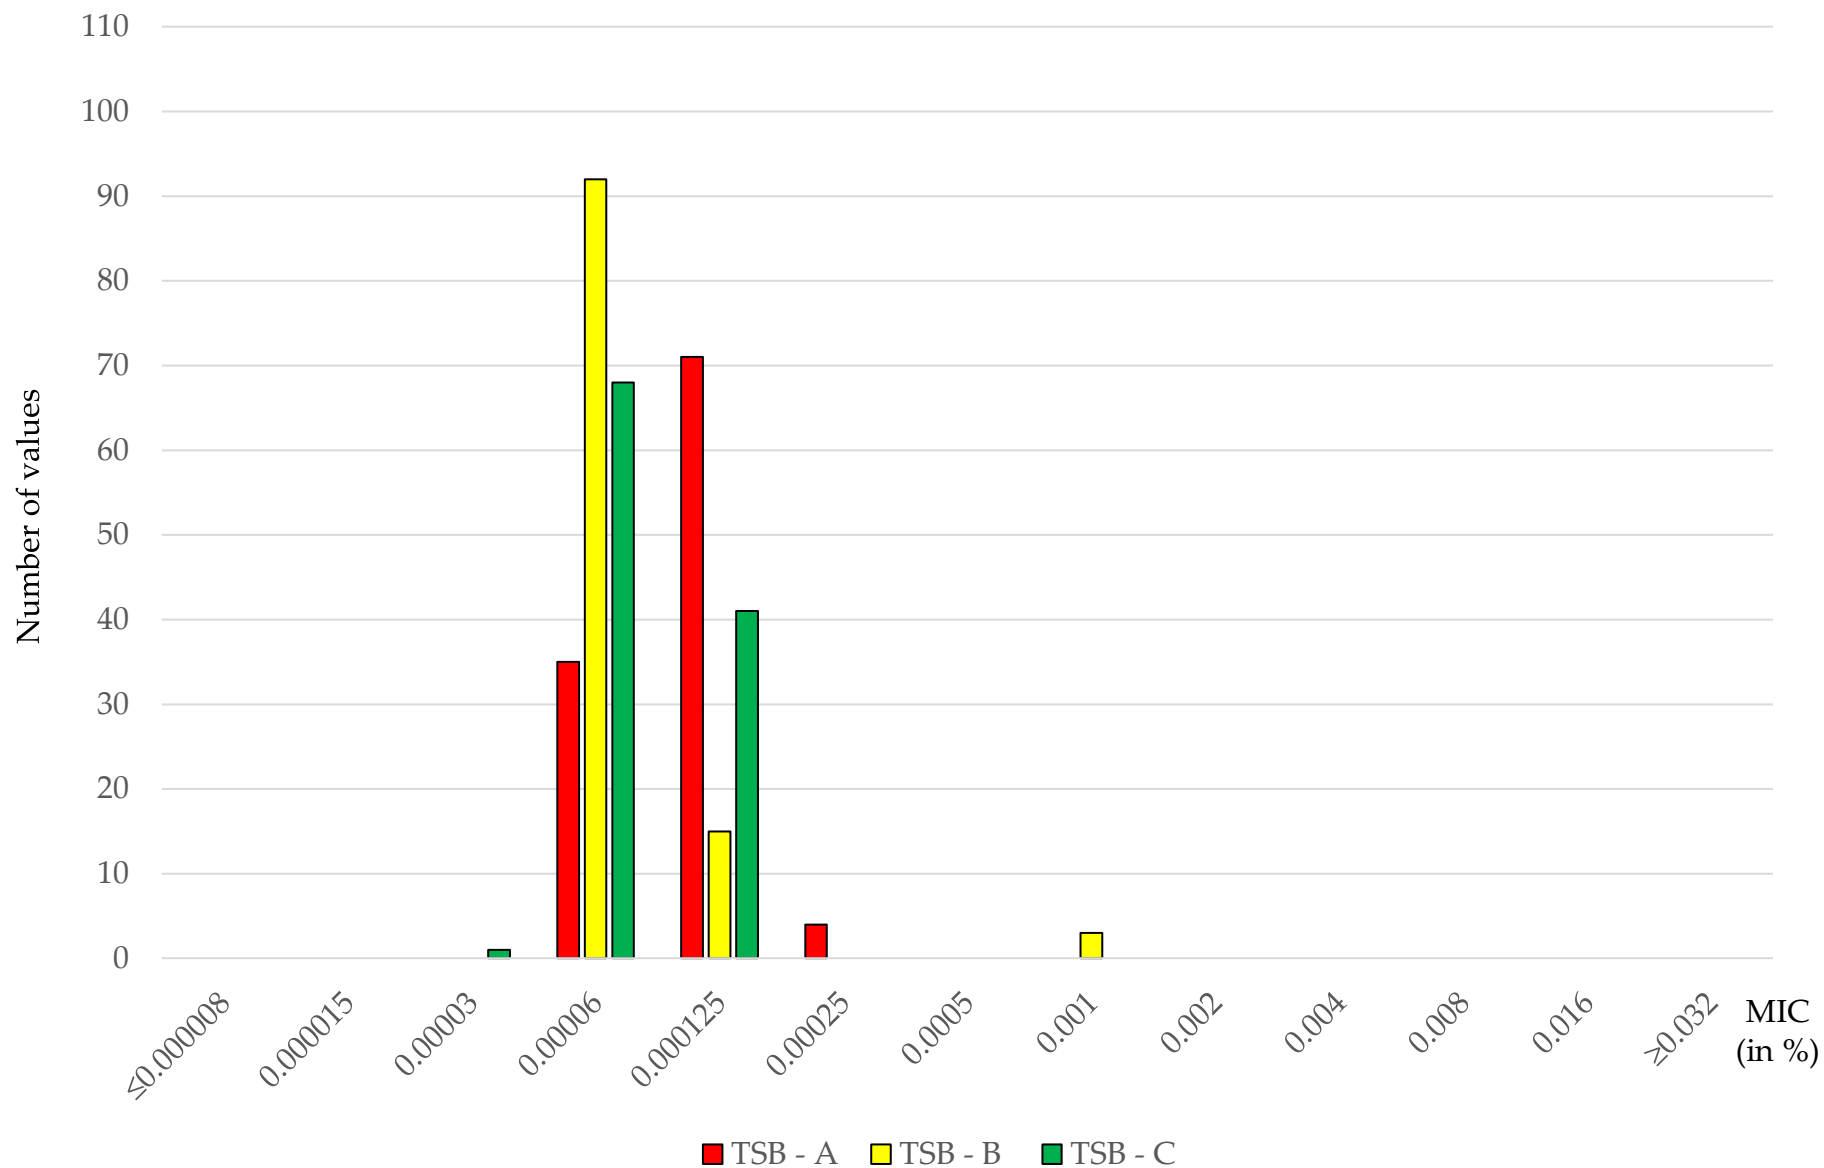

Figure S1a: Differences of the media lots for *S. aureus* ATCC® 6538 and benzalkonium chloride

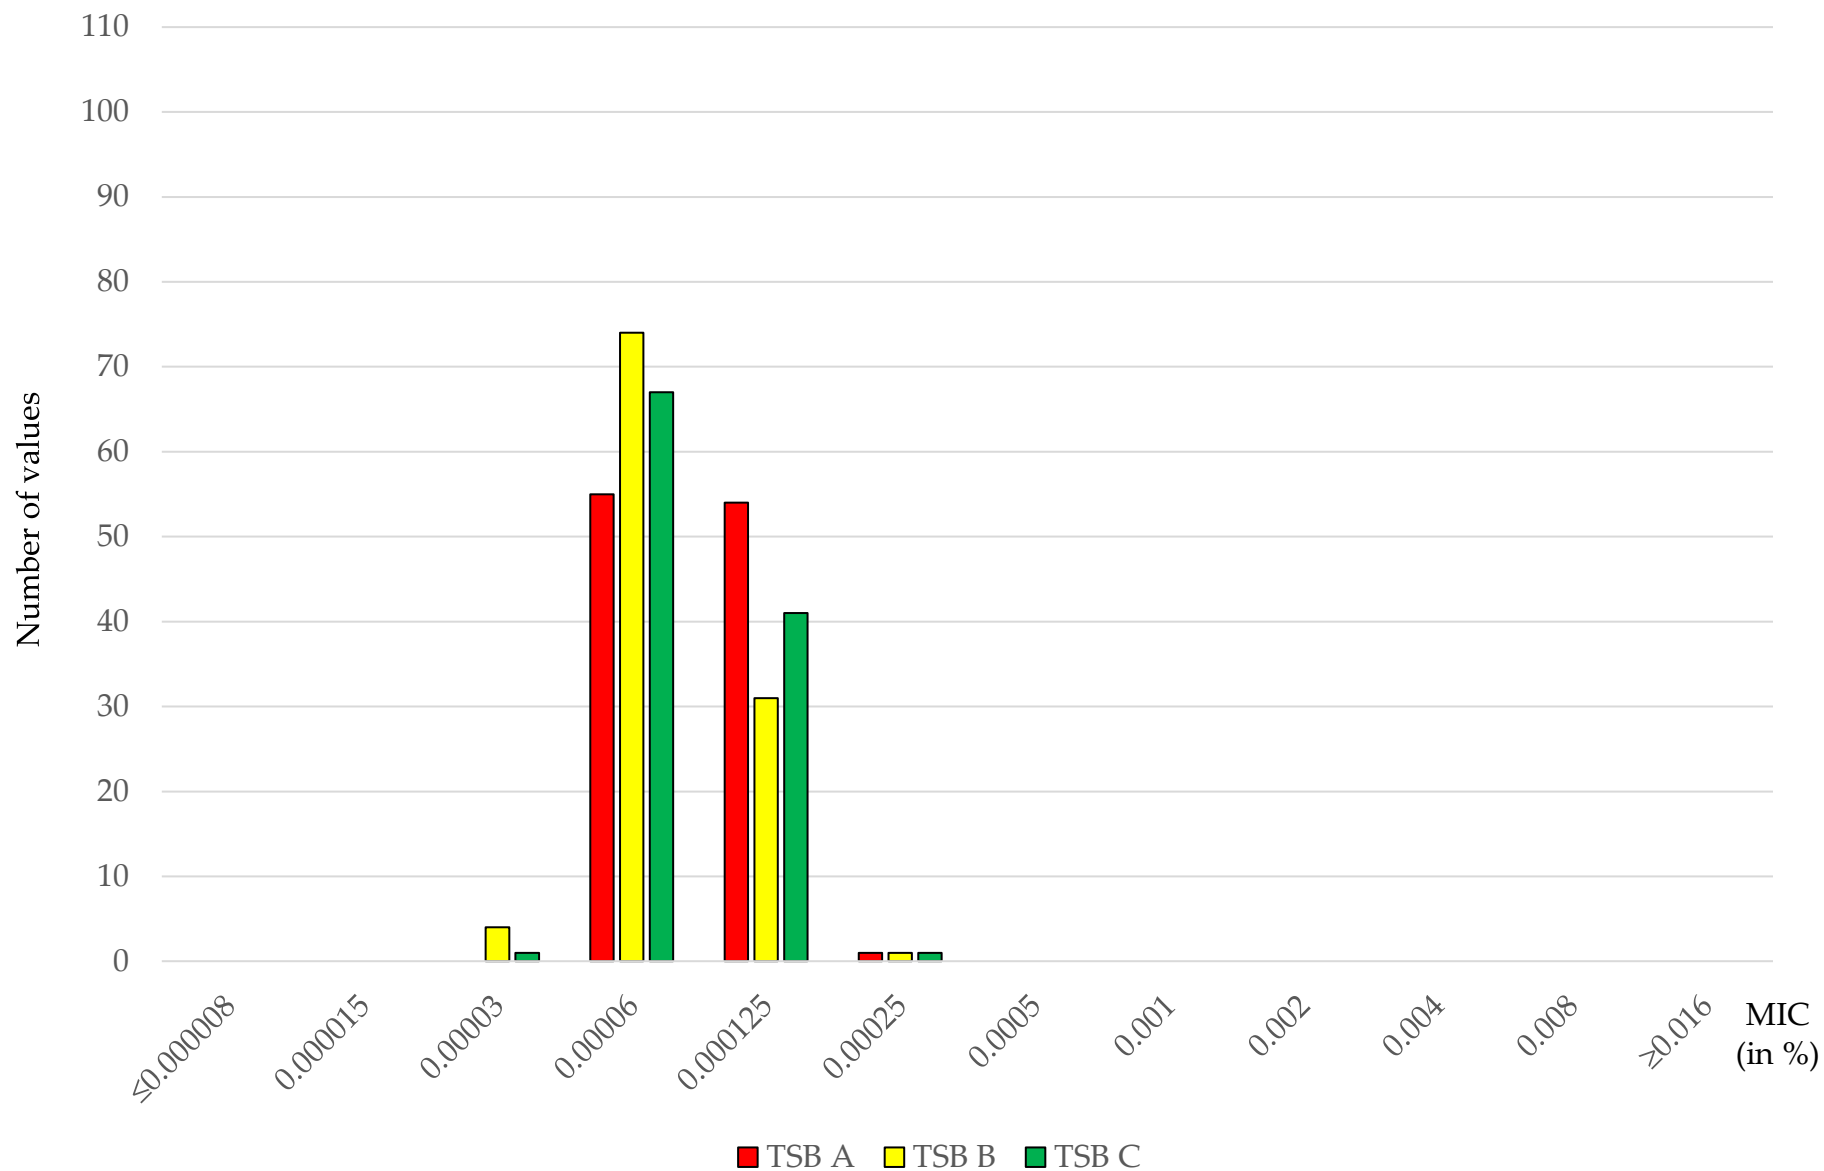

Figure S1b: Differences of the media lots for *S. aureus* ATCC® 6538 and chlorhexidine

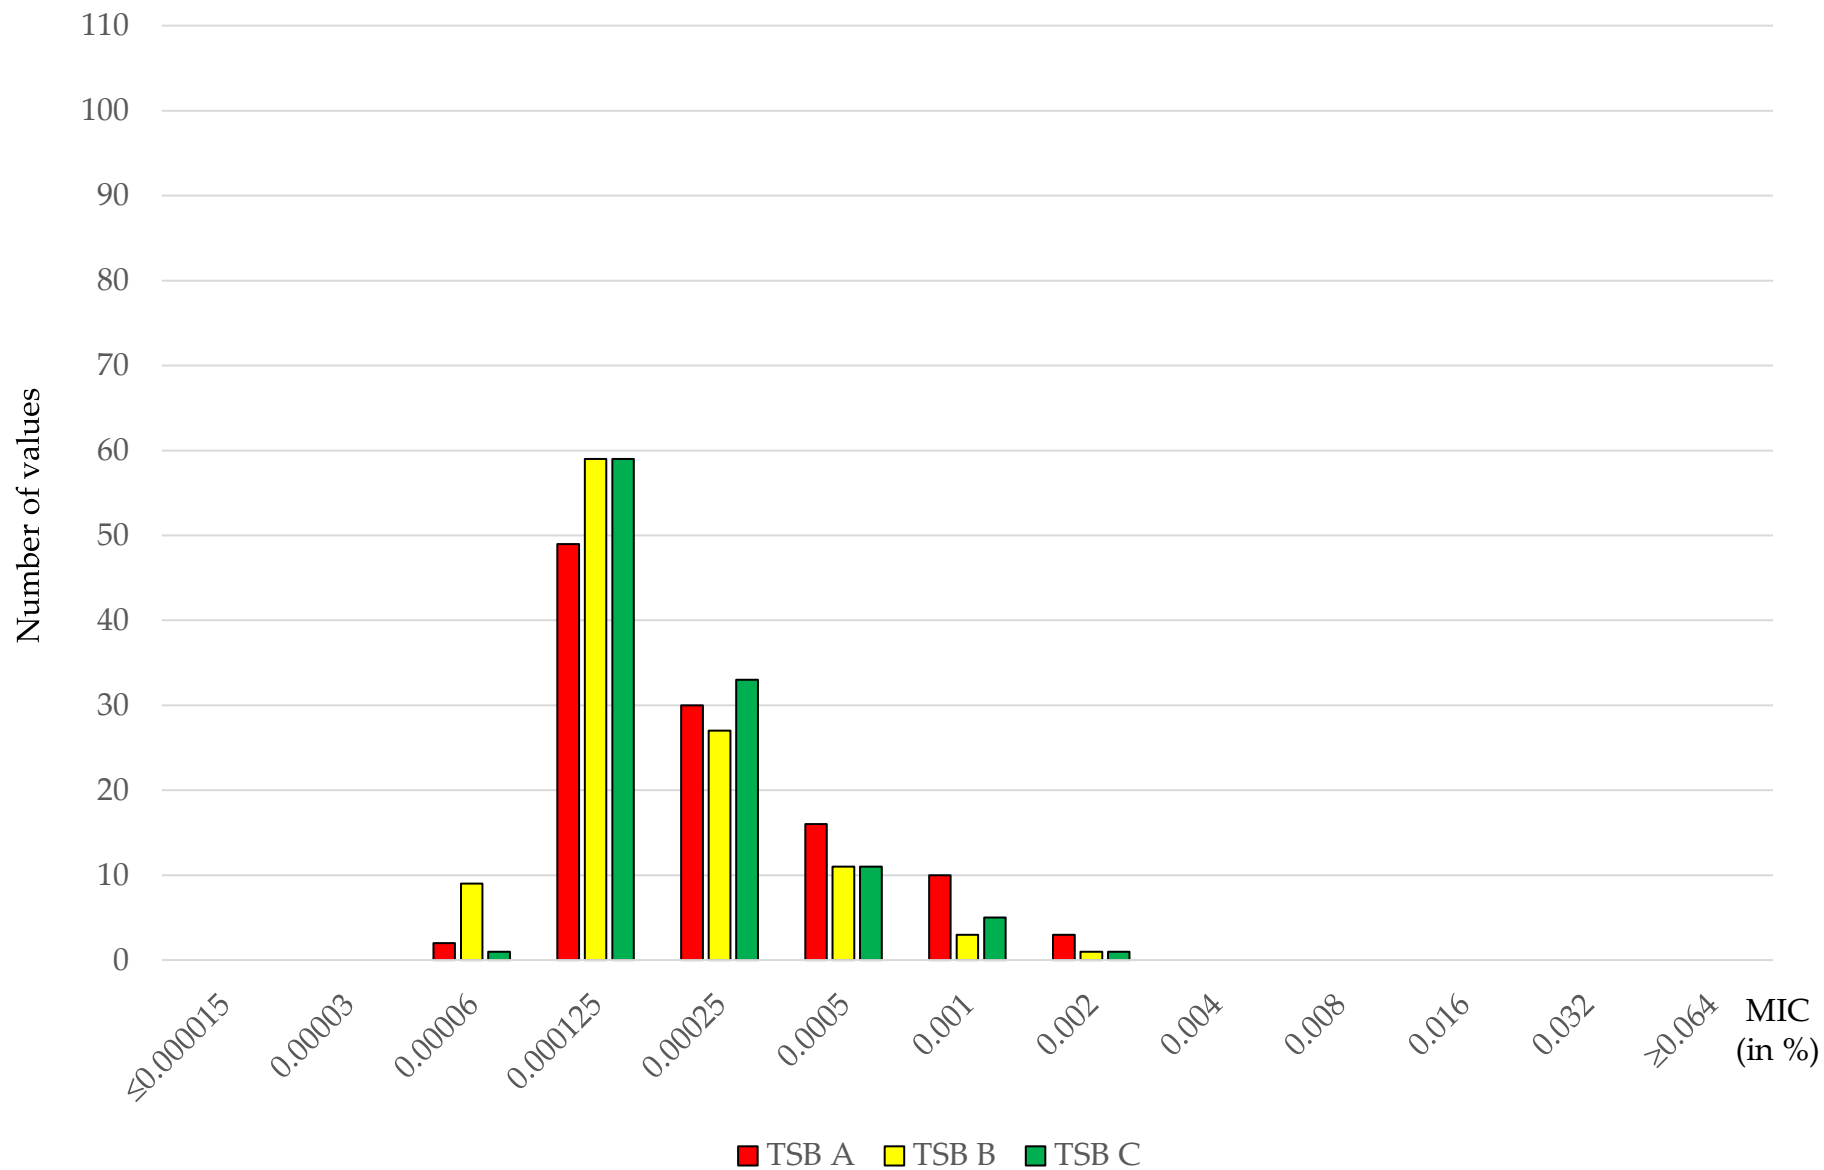

Figure S1c: Differences of the media lots for *S. aureus* ATCC® 6538 and polyhexanide

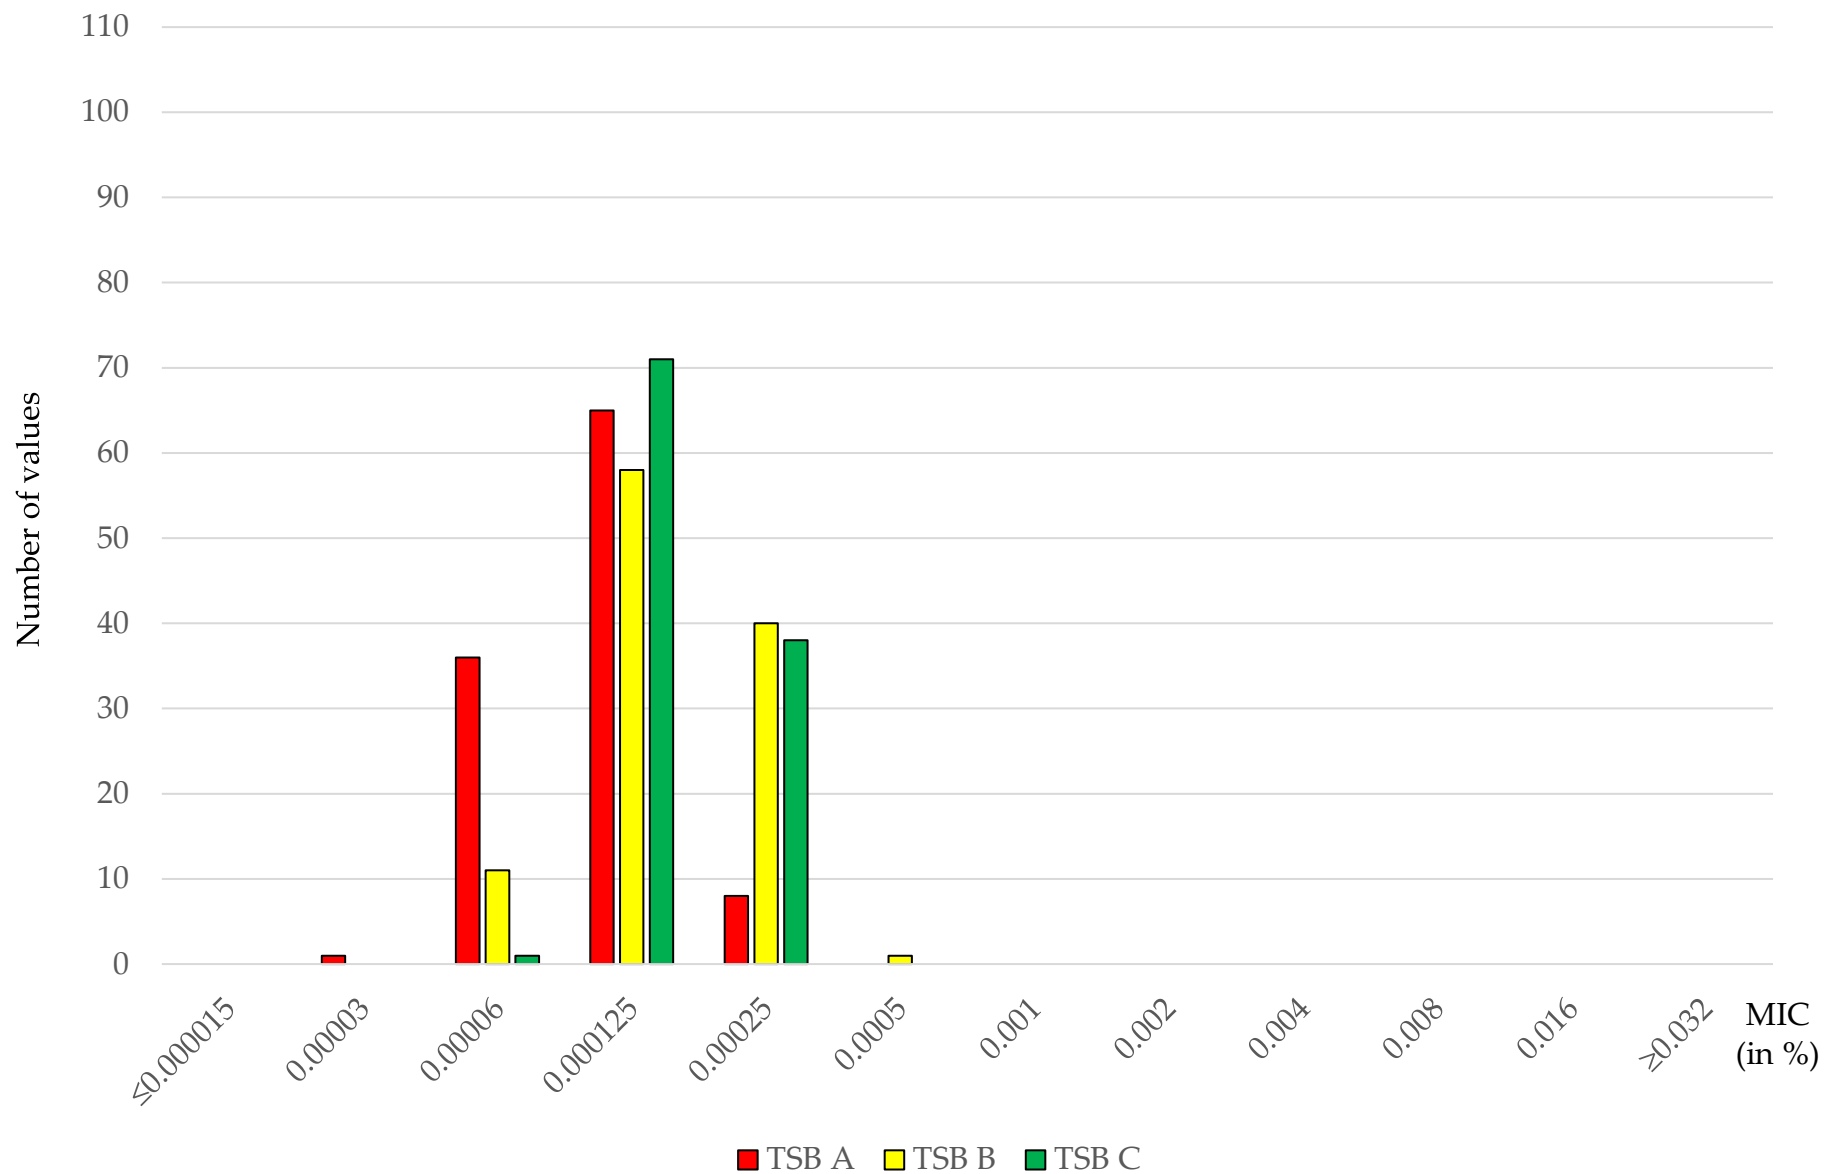

Figure S1d: Differences of the media lots for *S. aureus* ATCC® 6538 and octenidine
