# Supplementary material for: Development of Quality Control Ranges for Biocide Susceptibility Testing
Source: MDPI journal article supplement (doi:10.3390/pathogens11020223), 2022-02-08
Supplement: s1 [file s1]

Table S3. Summary of the QC ranges of *E. hirae* ATCC® 10541

| MIC<br>(in %) | Benzalkonium chloride | Chlorhexidine | Polyhexanide | Octenidine |
|---------------|-----------------------|---------------|--------------|------------|
| 0.064         |                       |               |              |            |
| 0.032         |                       |               |              |            |
| 0.016         |                       |               |              |            |
| 0.008         |                       |               | 1            |            |
| 0.004         |                       |               | 2            |            |
| 0.002         |                       |               | 26           |            |
| 0.001         |                       |               | 67           | 2          |
| 0.0005        | 2                     |               | 110          | 13         |
| 0.00025       | 224                   | 19            | 110          | 95         |
| 0.000125      | 104                   | 121           | 14           | 210        |
| 0.00006       |                       | 189           |              | 10         |
| 0.00003       |                       |               |              |            |
| 0.000015      |                       |               |              |            |
| 0.000008      |                       |               |              |            |

Biocide concentrations not tested are displayed in gray. The respective QC ranges are displayed as boxes
