# Supplementary material for: Development of Quality Control Ranges for Biocide Susceptibility Testing
Source: MDPI journal article supplement (doi:10.3390/pathogens11020223), 2022-02-08
Supplement: s1 [file s1]

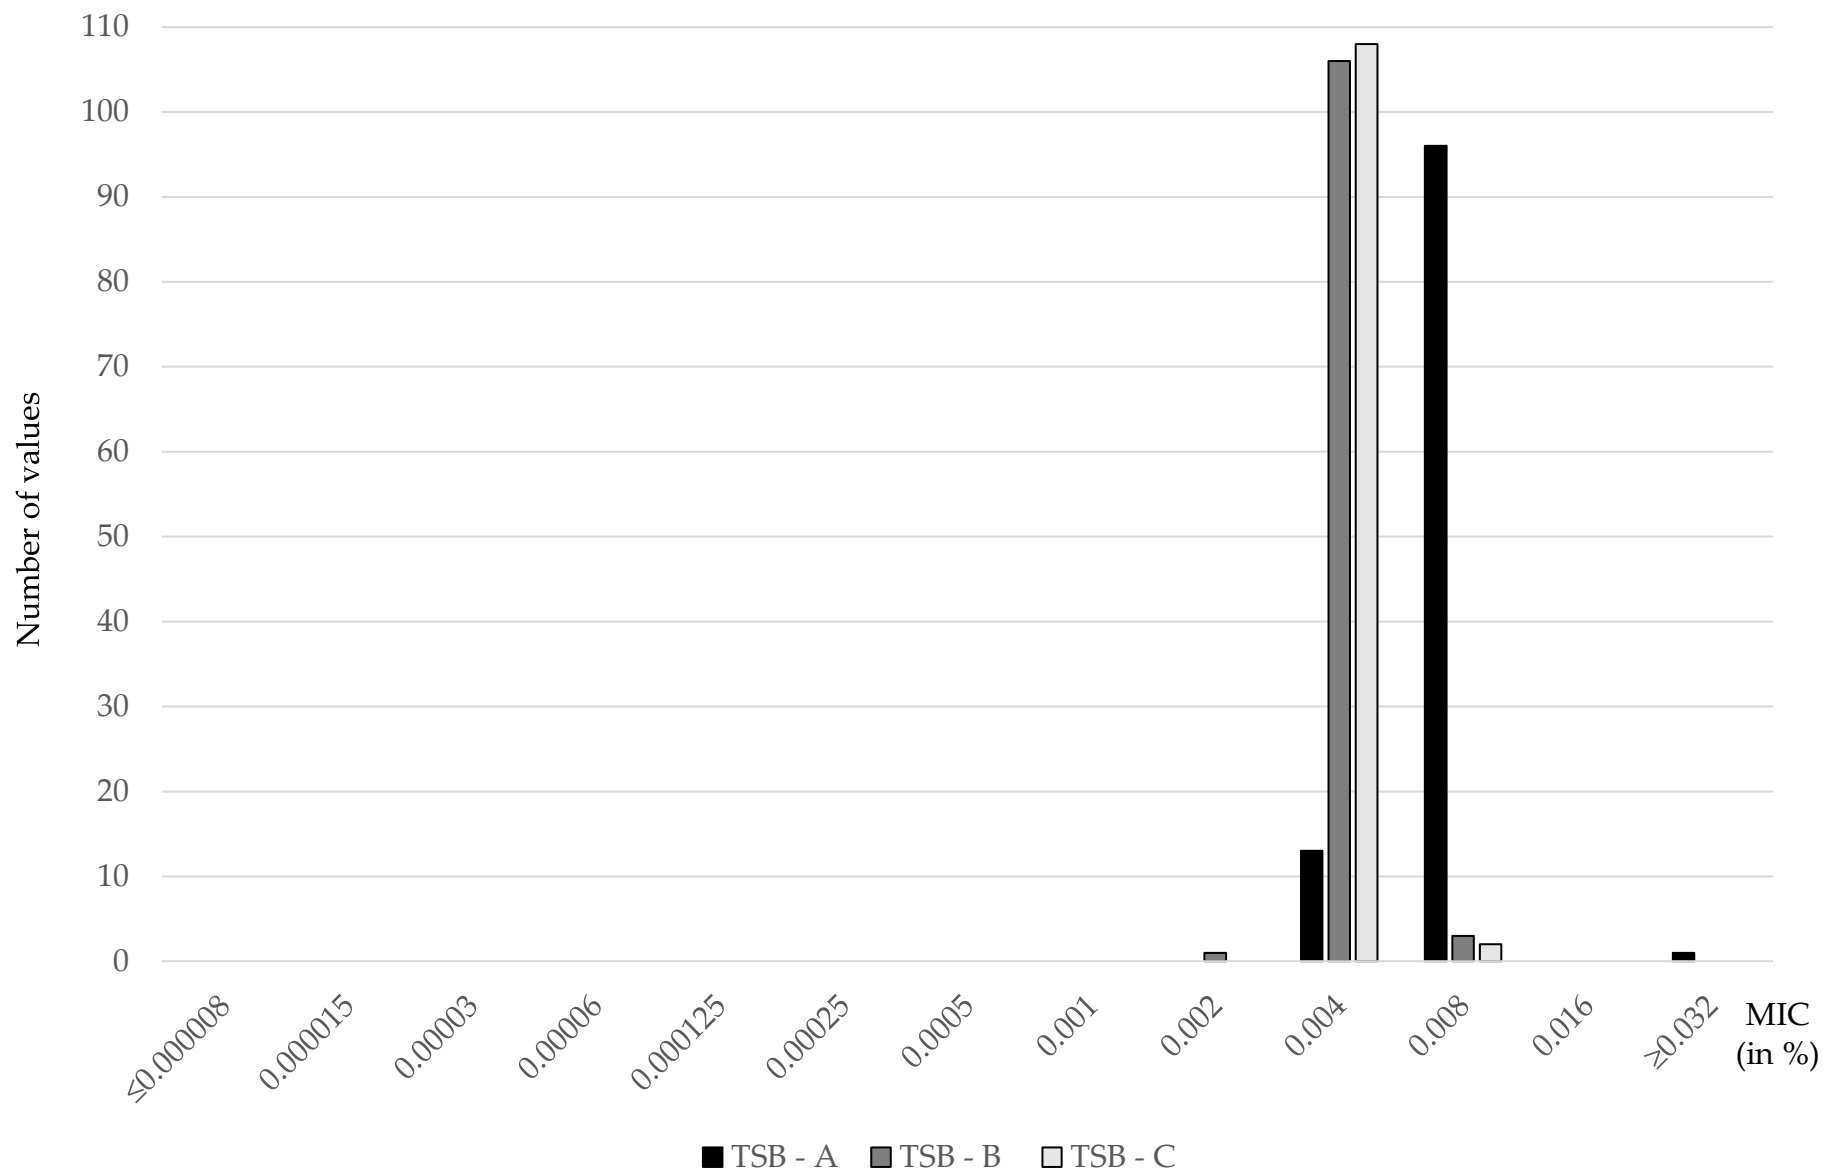

Figure S4a: Differences of the media lots for *P. aeruginosa* ATCC® 15442 and benzalkonium chloride

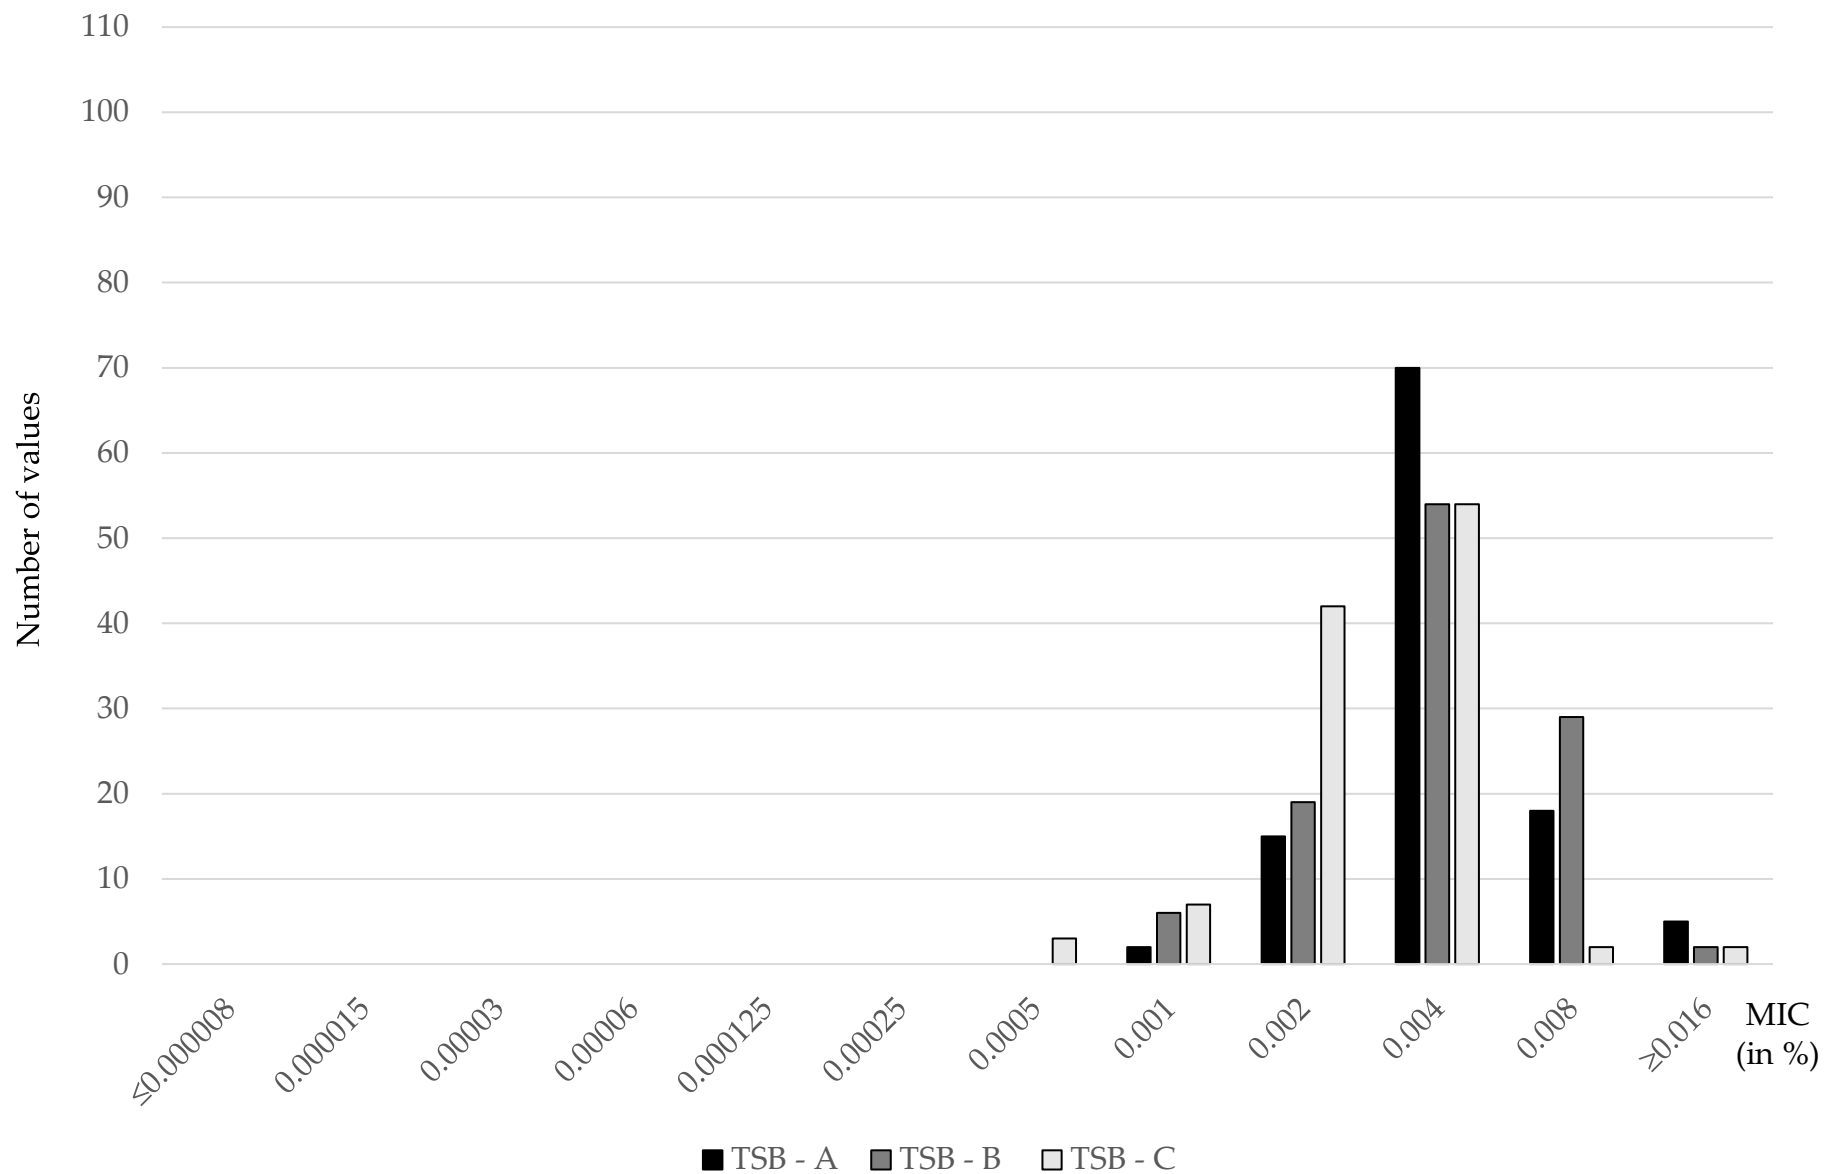

Figure S4b: Differences of the media lots for *P. aeruginosa* ATCC® 15442 and chlorhexidine

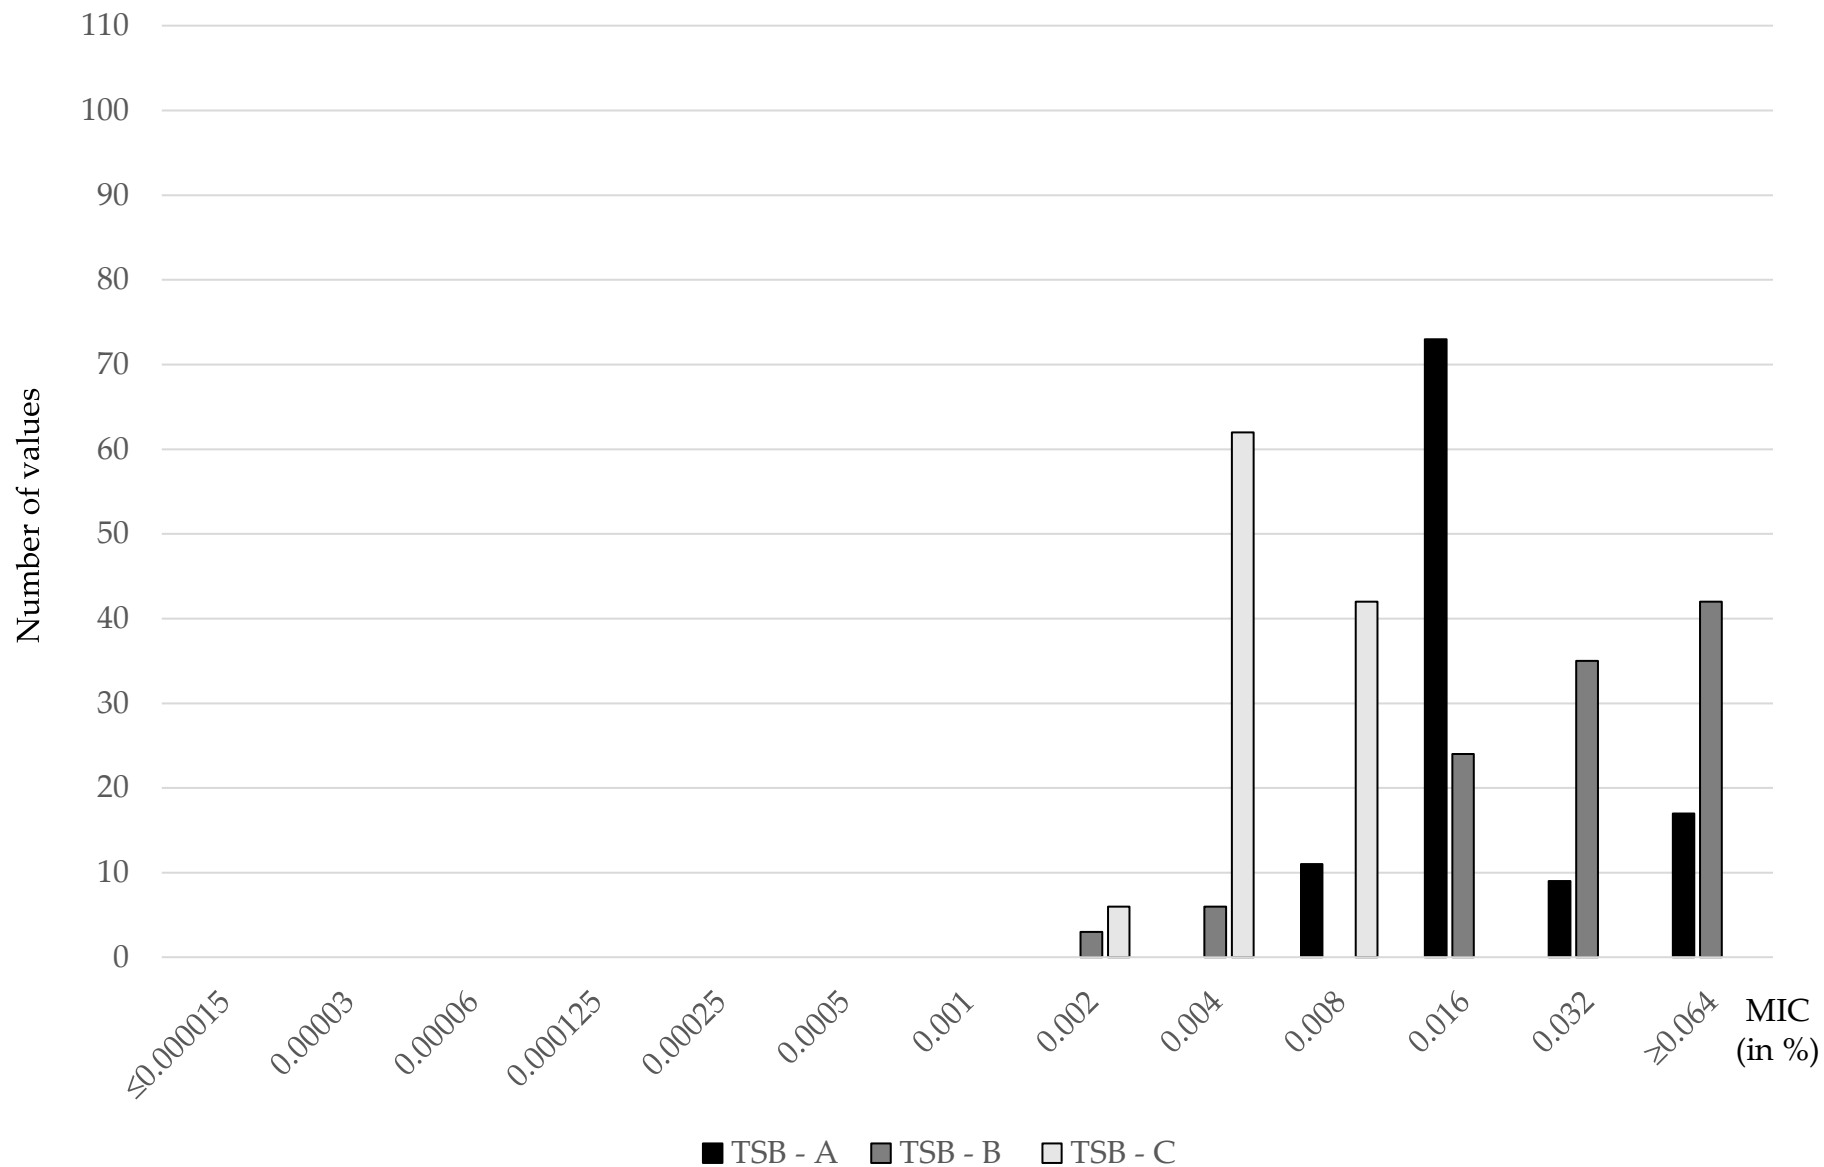

Figure S4c: Differences of the media lots for *P. aeruginosa* ATCC® 15442 and polyhexanide

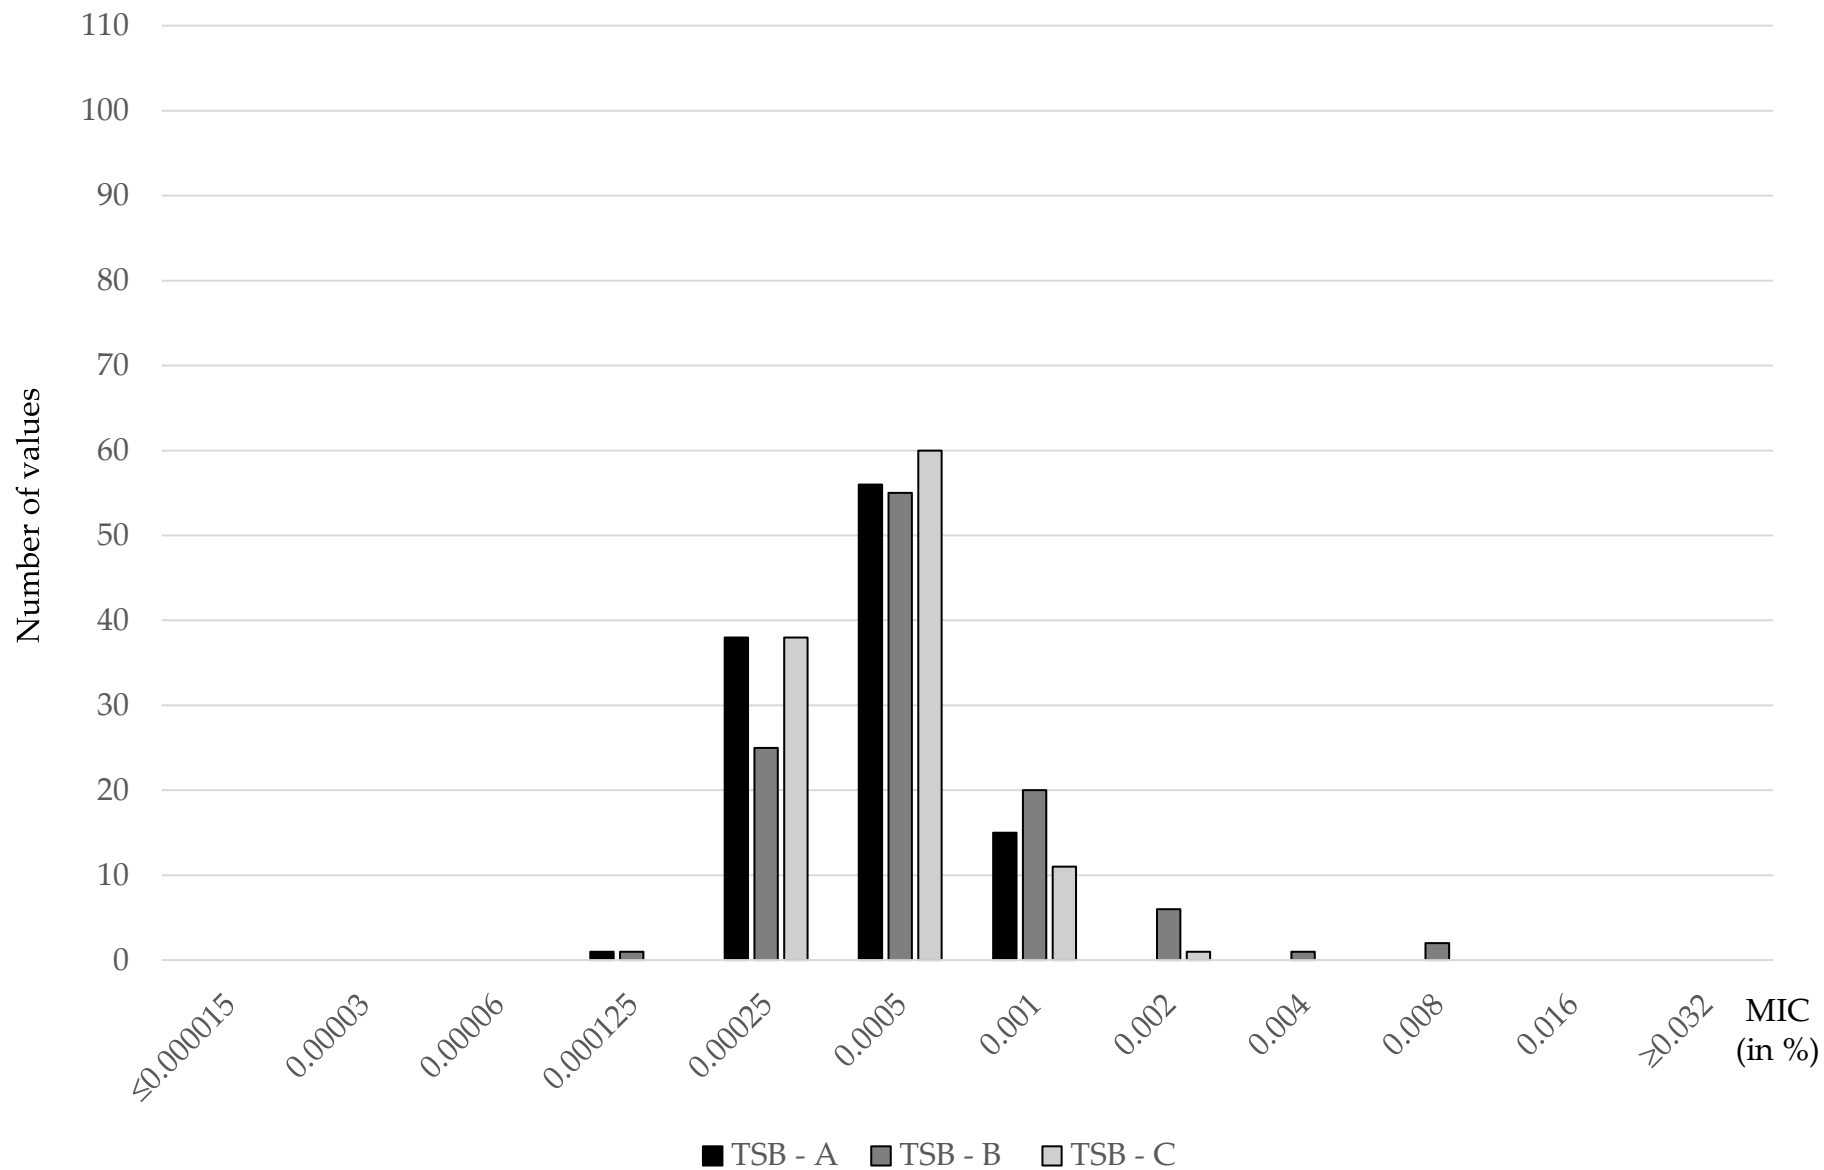

Figure S4d: Differences of the media lots for *P. aeruginosa* ATCC® 15442 and octenidine
