# Supplementary material for: Development of Quality Control Ranges for Biocide Susceptibility Testing
Source: MDPI journal article supplement (doi:10.3390/pathogens11020223), 2022-02-08
Supplement: s1 [file s1]

Table S4. Summary of the QC ranges of *E. coli* ATCC® 10536

| MIC<br>(in %) | Benzalkonium chloride | Chlorhexidine | Polyhexanide | Octenidine |
|---------------|-----------------------|---------------|--------------|------------|
| 0.064         |                       |               | 1            |            |
| 0.032         |                       |               |              |            |
| 0.016         |                       |               |              |            |
| 0.008         |                       |               |              |            |
| 0.004         |                       |               |              |            |
| 0.002         | 25                    |               | 4            | 1          |
| 0.001         | 217                   | 1             | 7            | 6          |
| 0.0005        | 87                    | 5             | 41           | 35         |
| 0.00025       | 1                     | 47            | 113          | 118        |
| 0.000125      |                       | 52            | 157          | 141        |
| 0.00006       |                       | 141           | 7            | 29         |
| 0.00003       |                       | 84            |              |            |
| 0.000015      |                       |               |              |            |
| 0.000008      |                       |               |              |            |

Biocide concentrations not tested are displayed in gray. The respective QC ranges are displayed as boxes
