# Supplementary material for: Development of Quality Control Ranges for Biocide Susceptibility Testing
Source: MDPI journal article supplement (doi:10.3390/pathogens11020223), 2022-02-08
Supplement: s1 [file s1]

Table S1. Summary of the QC ranges of *S. aureus* ATCC® 6538

| MIC<br>(in %) | Benzalkonium chloride | Chlorhexidine | Polyhexanide | Octenidine |
|---------------|-----------------------|---------------|--------------|------------|
| 0.064         |                       |               |              |            |
| 0.032         |                       |               |              |            |
| 0.016         |                       |               |              |            |
| 0.008         |                       |               |              |            |
| 0.004         |                       |               |              |            |
| 0.002         | 3                     |               | 5            |            |
| 0.001         |                       |               | 18           |            |
| 0.0005        |                       |               | 38           | 1          |
| 0.00025       | 4                     | 3             | 90           | 86         |
| 0.000125      | 127                   | 126           | 167          | 194        |
| 0.00006       | 195                   | 196           | 12           | 48         |
| 0.00003       | 1                     | 5             |              | 1          |
| 0.000015      |                       |               |              |            |
| 0.000008      |                       |               |              |            |

Biocide concentrations not tested are displayed in gray. The respective QC ranges are displayed as boxes
