# Supplementary material for: Development of Quality Control Ranges for Biocide Susceptibility Testing
Source: MDPI journal article supplement (doi:10.3390/pathogens11020223), 2022-02-08
Supplement: s1 [file s1]

Table S5. *P. aeruginosa* ATCC® 15442

a) Benzalkonium chloride

| MIC<br>(in %) | Lab 1 | Lab 2 | Lab 3 | Lab 4 | Lab 5 | Lab 6 | Lab 7 | Lab 8 | Lab 9 | Lab 10 | Lab 11 |
|---------------|-------|-------|-------|-------|-------|-------|-------|-------|-------|--------|--------|
| ≥0.032        |       |       |       |       |       |       |       |       |       |        |        |
| 0.016         |       |       |       |       |       |       |       |       |       |        |        |
| 0.008         | 10    | 7     | 10    | 8     | 8     | 8     | 8     | 12    | 10    | 10     | 10     |
| 0.004         | 20    | 23    | 20    | 21    | 22    | 22    | 21    | 18    | 20    | 20     | 20     |
| 0.002         |       |       |       |       |       |       |       |       |       |        |        |
| 0.001         |       |       |       |       |       |       |       |       |       |        |        |
| 0.0005        |       |       |       |       |       |       |       |       |       |        |        |
| 0.00025       |       |       |       |       |       |       |       |       |       |        |        |
| 0.000125      |       |       |       |       |       |       |       |       |       |        |        |
| 0.00006       |       |       |       |       |       |       |       |       |       |        |        |
| 0.00003       |       |       |       |       |       |       |       |       |       |        |        |
| 0.000015      |       |       |       |       |       |       |       |       |       |        |        |
| ≤0.000008     |       |       |       |       |       |       |       |       |       |        |        |

The white area represents the proposed QC range. The gray areas represent the parts of the test range outside the QC range. Values outside this QC range are displayed in red and italics.

b ) Chlorhexidine

| MIC<br>(in %) | Lab 1 | Lab 2 | Lab 3 | Lab 4 | Lab 5 | Lab 6 | Lab 7 | Lab 8 | Lab 9 | Lab 10 | Lab 11 |
|---------------|-------|-------|-------|-------|-------|-------|-------|-------|-------|--------|--------|
| ≥0.016        |       |       |       | 2     | 4     | 3     |       |       |       |        |        |
| 0.008         | 5     | 2     | 6     |       | 9     | 14    |       |       | 2     | 6      | 5      |
| 0.004         | 19    | 16    | 16    | 9     | 10    | 10    | 8     | 28    | 26    | 20     | 16     |
| 0.002         | 6     | 10    | 8     | 14    | 5     | 3     | 15    | 2     | 2     | 4      | 7      |
| 0.001         |       | 2     |       | 4     | 2     |       | 5     |       |       |        | 2      |
| 0.0005        |       |       |       |       |       |       |       |       |       |        |        |
| 0.00025       |       |       |       |       |       |       |       |       |       |        |        |
| 0.000125      |       |       |       |       |       |       |       |       |       |        |        |
| 0.00006       |       |       |       |       |       |       |       |       |       |        |        |
| 0.00003       |       |       |       |       |       |       |       |       |       |        |        |
| 0.000015      |       |       |       |       |       |       |       |       |       |        |        |
| ≤0.000008     |       |       |       |       |       |       |       |       |       |        |        |

The white area represents the range calculated by the RangeFinder software. The gray areas represent the parts of the test range outside the calculated QC range. Due to the lack of an exact upper limit no QC range was set.

c) Polyhexanide

| MIC<br>(in %) | Lab 1 | Lab 2 | Lab 3 | Lab 4 | Lab 5 | Lab 6 | Lab 7 | Lab 8 | Lab 9 | Lab 10 | Lab 11 |
|---------------|-------|-------|-------|-------|-------|-------|-------|-------|-------|--------|--------|
| ≥0.064        | 10    |       |       | 4     | 4     | 11    | 5     |       | 20    |        | 5      |
| 0.032         | 2     | 5     | 4     |       | 8     | 2     | 2     |       |       | 8      | 13     |
| 0.016         | 8     | 15    | 13    | 13    | 8     | 4     | 13    | 10    |       | 11     | 2      |
| 0.008         | 7     | 1     | 3     | 8     | 4     | 6     |       | 4     | 8     | 3      | 9      |
| 0.004         | 3     | 8     | 9     | 4     | 6     | 6     | 8     | 13    | 2     | 8      | 1      |
| 0.002         |       | 1     | 1     | 1     |       | 1     | 2     | 3     |       |        |        |
| 0.001         |       |       |       |       |       |       |       |       |       |        |        |
| 0.0005        |       |       |       |       |       |       |       |       |       |        |        |
| 0.00025       |       |       |       |       |       |       |       |       |       |        |        |
| 0.000125      |       |       |       |       |       |       |       |       |       |        |        |
| 0.00006       |       |       |       |       |       |       |       |       |       |        |        |
| 0.00003       |       |       |       |       |       |       |       |       |       |        |        |
| ≤0.000015     |       |       |       |       |       |       |       |       |       |        |        |

The white area represents the range calculated by the RangeFinder software. The gray areas represent the parts of the test range outside the calculated QC range. Due to the lack of an exact upper limit no QC range was set.

d) Octenidine

| MIC<br>(in %) | Lab 1 | Lab 2 | Lab 3 | Lab 4 | Lab 5 | Lab 6 | Lab 7 | Lab 8 | Lab 9 | Lab 10 | Lab 11 |
|---------------|-------|-------|-------|-------|-------|-------|-------|-------|-------|--------|--------|
| ≥0.032        |       |       |       |       |       |       |       |       |       |        |        |
| 0.016         |       |       |       |       |       |       |       |       |       |        |        |
| 0.008         |       |       |       |       |       |       |       |       |       |        |        |
| 0.004         |       |       |       |       |       |       |       |       |       |        |        |
| 0.002         |       |       |       |       |       |       |       |       |       |        |        |
| 0.001         | 3     | 2     | 10    | 6     | 5     | 2     |       | 2     | 4     | 2      | 10     |
| 0.0005        | 20    | 16    | 13    | 16    | 12    | 16    | 3     | 23    | 22    | 20     | 10     |
| 0.00025       | 7     | 10    | 7     | 5     | 12    | 10    | 26    | 5     | 4     | 8      | 7      |
| 0.000125      |       |       |       |       |       |       |       |       |       |        |        |
| 0.00006       |       |       |       |       |       |       |       |       |       |        |        |
| 0.00003       |       |       |       |       |       |       |       |       |       |        |        |
| ≤0.000015     |       |       |       |       |       |       |       |       |       |        |        |

The white area represents the proposed QC range. The gray areas represent the parts of the test range outside the QC range. Values outside this QC range are displayed in red and italics.
