# Supplementary material for: Development of Quality Control Ranges for Biocide Susceptibility Testing
Source: MDPI journal article supplement (doi:10.3390/pathogens11020223), 2022-02-08
Supplement: s1 [file s1]

Table S6. Summary of the QC ranges of *P. aeruginosa* ATCC® 15442

| MIC<br>(in %) | Benzalkonium chloride | Chlorhexidine | Polyhexanide | Octenidine |
|---------------|-----------------------|---------------|--------------|------------|
| 0.064         | 1                     | 9             | 59           |            |
| 0.032         |                       |               | 44           |            |
| 0.016         |                       |               | 97           |            |
| 0.008         | 101                   | 49            | 53           | 2          |
| 0.004         | 227                   | 178           | 68           | 1          |
| 0.002         | 1                     | 76            | 9            | 7          |
| 0.001         |                       | 15            |              | 46         |
| 0.0005        |                       | 3             |              | 171        |
| 0.00025       |                       |               |              | 101        |
| 0.000125      |                       |               |              | 2          |
| 0.00006       |                       |               |              |            |
| 0.00003       |                       |               |              |            |
| 0.000015      |                       |               |              |            |
| 0.000008      |                       |               |              |            |

Biocide concentrations not tested are displayed in gray. The respective QC ranges are displayed as boxes
